# Supplementary material for: Ligand-passivated Au/Cu nanoclusters with uncoordinated sites give reaction turnover numbers of up to 4 × 104
Source: Royal Society of Chemistry journal article supplement (doi:10.1039/d3qi01035j), 2023-01-01
Supplement: d3qi01035j1.pdf [file d3qi01035j1.pdf]

## **Ligand-Passivated Au/Cu Nanoclusters with Uncoordinated Sites Give Reaction Turnover Numbers up to $4 \times 10^4$**

Lu Dong,<sup>1,2,†</sup> Linke Yu,<sup>3,†</sup> Xueli Sun,<sup>1,†</sup> Xiongkai Tang,<sup>4,†</sup> Xuexin You,<sup>3</sup> Jiaqi Tang,<sup>5</sup> Zi-Ang Nan,<sup>6</sup>  
Dongxu Cao,<sup>4</sup> Yanyuan Jia,<sup>2</sup> Simin Li,<sup>1</sup> Fengyu Li,<sup>3,\*</sup> Shuo Guo,<sup>2,\*</sup> Hui Shen<sup>1,\*</sup>

<sup>1</sup>College of Energy Materials and Chemistry, Inner Mongolia University, Hohhot 010021, China

<sup>2</sup>College of Chemistry and Chemical Engineering, Inner Mongolia University, Hohhot 010021, China

<sup>3</sup>School of Physical Science and Technology, Inner Mongolia University, Hohhot, 010021 China

<sup>4</sup>State Key Laboratory for Physical Chemistry of Solid Surfaces, College of Chemistry and Chemical Engineering, Xiamen University, Xiamen 361005, China

<sup>5</sup>CAS Center for Excellence in Nanoscience, Beijing Key Laboratory of Micro-nano Energy and Sensor, Beijing Institute of Nanoenergy and Nanosystems, Chinese Academy of Sciences, Beijing, 101400, China

<sup>6</sup>CAS Key Laboratory of Design and Assembly of Functional Nanostructures, and Fujian Provincial Key Laboratory of Nanomaterials, Fujian Institute of Research on the Structure of Matter, Chinese Academy of Sciences, China

To whom correspondence should be addressed. E-mail: shen@imu.edu.cn; shuoguo@imu.edu.cn; fengyuli@imu.edu.cn.

These authors contributed equally to this work: Lu Dong, Linke Yu, Xueli Sun, and Xiongkai Tang

### **Experimental Details**

**Reagents:** Cuprous oxide ( $\text{Cu}_2\text{O}$ ,  $\geq 99.99\%$  trace metals basis, anhydrous), tetrafluoroboric acid solution ( $\text{HBF}_4$ , 48 wt.% in water), 4-fluorothiophenol (4-F- $\text{C}_6\text{H}_5\text{SH}$ ), triethylamine ( $(\text{C}_2\text{H}_5)_3\text{N}$ ,  $\geq 99\%$ ) are purchased from Innochem (Beijing, China). Hydrogen tetrachloroaurate ( $\text{HAuCl}_4 \cdot 4\text{H}_2\text{O}$ , 99.9%), sodium borohydride ( $\text{NaBH}_4$ , 98%), acetonitrile ( $\text{CH}_3\text{CN}$ ), dichloromethane ( $\text{CH}_2\text{Cl}_2$ , A.R.), methanol ( $\text{CH}_3\text{OH}$ , A.R.), ethanol ( $\text{C}_2\text{H}_5\text{OH}$ , A.R.) and ether ( $\text{C}_4\text{H}_{10}\text{O}$ , A.R.) were purchased from Sinopharm Chemical Reagent Co. Ltd (Shanghai, China). All other reagents except for  $\text{CH}_3\text{CN}$  were used as received without further purification.  $\text{CH}_3\text{CN}$  used in reactions were dried by refluxing over  $\text{CaH}_2$  (2g/L) for 1 hour, and fractional distillation, then added dried type 4Å Linde molecular sieves. Water used in all experiments was ultrapure.  $\text{AuSMe}_2\text{Cl}^1$ ,  $[\text{Au}_9\text{Cu}_2(\text{PPh}_3)_8\text{Cl}_2]\text{BF}_4^2$  and  $\text{AuCu}_{24}\text{H}_{22}(\text{C}_{18}\text{H}_{11}\text{F}_3\text{P})_{12}^3$  were prepared according to literature methods.

**Synthesis of  $[\text{Cu}(\text{CH}_3\text{CN})_4]\text{BF}_4$ .** The complex was prepared with slightly modified method reported by Osman et al.: Initially, 2 gm of cuprous oxide and 100 mL of acetonitrile was taken in a round bottom flask. Then the flask was placed in an oil bath and the temperature of the oil bath was maintained at  $75^\circ\text{C}$ . After a few minutes of stirring, 15 mL of the tetrafluoro-boric acid was added to the above solution. The stirring was continued for 10-15 min. During this process, the solution turned to almost transparent. The hot solution was filtered quickly using a filter paper and the filtrate was kept in the fridge ( $0^\circ\text{C}$ ). After 12 h, white crystals of  $[\text{Cu}(\text{CH}_3\text{CN})_4]\text{BF}_4$  was collected through filtration and it was washed two times with diethyl ether. Then the complex was transferred to a sample bottle and stored under nitrogen.

**Synthesis of  $\text{AuSC}_6\text{H}_4\text{F}$ .** In the absence of light, 63.5  $\mu\text{L}$  4-fluorothiophenol and then 83  $\mu\text{L}$   $\text{NEt}_3$  were added to 8 mL acetone containing 150 mg  $\text{AuSMe}_2\text{Cl}$ . The mixture was stirred for 0.5 h and dried up. Obtained solid was fully washed by water (10 mL), ethanol (10 mL) and ether (10 mL) to give 105.7 mg (90% yield based on Au) of  $\text{AuSC}_6\text{H}_4\text{F}$ .

**Synthesis of  $\text{Au}_{41}\text{Cu}_{33}$ :** 7.8 mg fresh  $[\text{Cu}(\text{CH}_3\text{CN})_4]\text{BF}_4$  (0.025 mmol) was first dissolved in 3 mL mixed solvent of  $\text{CH}_2\text{Cl}_2$  and MeOH ( $V(\text{CH}_2\text{Cl}_2): V(\text{MeOH})=2:1$ ). To the colorless solution were added 2.6  $\mu\text{L}$  of 4-F- $\text{C}_6\text{H}_5\text{SH}$  (0.025 mmol) and 3.5  $\mu\text{L}$  of  $\text{NEt}_3$  (0.025 mmol). The solution was stirred for another 20 min before the addition of 8.7 mg  $\text{NaBH}_4$  (0.23 mmol) in 0.25 mL of MeOH. The solution was further stirred for another 12 h, washed with water (6 mL) for three times to afford copper hydride as pale orangish solution. To above copper hydride solution, 17.8 mg  $\text{AuSC}_6\text{H}_4\text{F}$  (0.055 mmol) was added. The polymeric solid dissolved gradually and the solution turned brown after stirring for 5 min. The brown solution was then stirred for 8 h in the absence of light to obtain raw product. After that, the solution was subjected to diffusion of hexane at  $4^\circ\text{C}$ . After two weeks, red block crystals were obtained in the yield of 26.9%.

**Characterizations:** UV-Vis spectra were collected by Shimadzu UV-2550 Spectrophotometer. Energy-dispersive X-ray spectroscopy was recorded on GeminiSEM 500. The data for NMR spectra ( $^1\text{H}$  NMR, and  $^{19}\text{F}$  NMR) were recorded at 293 K on a Bruker Avance NEO 600 MHz and chemical shifts were recorded relative to the solvent resonance. Signal positions were recorded in ppm and the following abbreviations are used singularly or in combination to indicate the multiplicity of signals: *s* singlet, *d* doublet, *t* triplet, *q* quartet, *m* multiplet, Hz Hertz. For  $^1\text{H}$  NMR:  $\text{CDCl}_3 = \delta$  7.26 ppm,  $^{13}\text{C}$  NMR:  $\text{CDCl}_3 = \delta$  77.16 ppm. Mass spectra were recorded on an Agilent Technologies ESI-TOF-MS.

X-ray single-crystal analysis: The diffraction data of the single crystals [Au<sub>41</sub>Cu<sub>33</sub>(RS)<sub>40</sub>(MeCN)] nanocluster was collected on an Agilent Technologies SuperNova system X-ray single-crystal diffractometer using Cu K $\alpha$  ( $\lambda$ = 1.54184 Å) at 160 K. The data were processed using CrysAlis<sup>Pro</sup>.<sup>4</sup> The structure was solved and refined using Full-matrix least-squares based on F<sub>2</sub> using ShelXT,<sup>5</sup> ShelXL<sup>6</sup> in Olex2,<sup>7</sup> and Shelxl.<sup>8</sup> Detailed crystal data and structure refinements for the compound are given in Table S1. CCDC 2211306 contains the supplementary crystallographic data for this paper. These data can be obtained free of charge from The Cambridge Crystallographic Data Centre via [www.ccdc.cam.ac.uk/data\\_request/cif](http://www.ccdc.cam.ac.uk/data_request/cif).

**DFT calculation:** Density functional theory calculations were carried out using Perdew-Burke-Ernzerhof (PBE) functional<sup>9</sup> as implemented in DMol<sup>3</sup> program<sup>10, 11</sup>. All electron potential and DNP basis set were employed to treat electrons. During optimization, all atoms were allowed to relax until the self-consistent field tolerance was no larger than 10<sup>-4</sup>, and the orbital cutoff was set as 3.4 Å. The Mulliken method<sup>12</sup> was adopted for charge analysis.

### General procedure for the C-O coupling (1.2 mmol scale)

All catalytic reactions were conducted in oven- or flame-dried glassware under an atmosphere of nitrogen unless otherwise noted. In an N<sub>2</sub> glovebox, to phenol coupling partner (1.20 mmol, 1.00 equiv), aryl halide (1.80 mmol, 1.50 equiv), activated 4Å molecular sieves (20.0 mg) and catalyst Au<sub>41</sub>Cu<sub>33</sub> (20 mg in activated carbon (XC-72), 2.628 x 10<sup>-5</sup> mmol, 0.00219 mol%) in a 4.00 mL sealed vial tube were added Cs<sub>2</sub>CO<sub>3</sub> (2.4 mmol, 2.0 equiv) and dry CH<sub>3</sub>CN (1.2 mL). The resulting mixture was stirred for 24 h at 85°C in the heating module. The reaction mixture was allowed to cool to room temperature, diluted with dichloromethane and filtered through a plug of celite®, the filter cake being further washed with dichloromethane (~ 50 mL). The filtrate was concentrated in vacuo to yield the crude product, that was purified by preparative thin-layer chromatography with developing agent of petroleum ether and ethyl acetate.

#### 1-Phenoxy-3-(trifluoromethyl)benzene (**3a**)

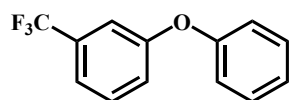

General procedure was used with 1-iodo-3-(trifluoromethyl)benzene (1.8 mmol, 259.5  $\mu$ L), phenol (1.2 mmol, 94.11 mg). Reaction ran for 24 h at 85 °C. The product was isolated by preparative thin-layer chromatography with petroleum ether, affording **3a** in 67% yield (160.4 mg) as a yellow liquid. R<sub>f</sub> = 0.40 (petroleum ether). **NMR Spectroscopy:** <sup>1</sup>H NMR (600 MHz, CDCl<sub>3</sub>)  $\delta$  7.45 – 7.32 (m, 4H), 7.26 (s, 1H), 7.19 – 7.14 (m, 2H), 7.06 – 7.02 (m, 2H). <sup>19</sup>F NMR (565 MHz, CDCl<sub>3</sub>)  $\delta$  -62.72 (s, 3F). The compound data was in agreement with the literature.<sup>13</sup>

#### 6-Phenoxyquinoline (**3b**)

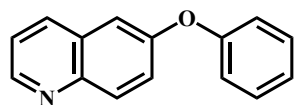

General procedure was used with 6-iodoquinoline (1.8 mmol, 459.1 mg), phenol (1.2 mmol, 94.11 mg). Reaction ran for 24 h at 85 °C. The product was isolated by preparative thin-layer chromatography with petroleum ether and ethyl acetate (50:1 (v/v)), affording **3b** in 75% yield (166.1 mg) as a yellow solid.

$R_f = 0.30$  (petroleum ether/ ethyl acetate 20:1 (v/v)). **NMR Spectroscopy:**  $^1\text{H NMR}$  (600 MHz,  $\text{CDCl}_3$ )  $\delta$  8.95 (s, 1H),  $\delta$  8.24 (s, 1H),  $\delta$  8.07 (s, 1H), 7.86 (d,  $J = 9.0$  Hz, 1H), 7.57 – 7.36 (m, 3H), 7.26 – 7.10 (m, 2H), 7.13 (d,  $J = 8.0$  Hz, 2H). The compound data was in agreement with the literature.<sup>14</sup>

#### 4-Phenoxybenzonitrile(**3c**)

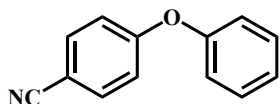

General procedure was used with 4-iodobenzonitrile (1.8 mmol, 412.2 mg), phenol (1.2 mmol, 94.11 mg). Reaction ran for 24 h at 85 °C. The product was isolated by preparative thin-layer chromatography with petroleum ether and ethyl acetate (50:1 (v/v)), affording **3c** in 86% yield (167.9 mg) as a yellow solid.

$R_f = 0.30$  (petroleum ether/ ethyl acetate 20:1 (v/v)). **NMR Spectroscopy:**  $^1\text{H NMR}$  (600 MHz,  $\text{CDCl}_3$ )  $\delta$  7.62 – 7.58 (m, 2H), 7.44 – 7.39 (m, 2H), 7.26 – 7.21 (m, 1H), 7.09 – 7.05 (m, 2H), 7.03 – 6.98 (m, 2H). The compound data was in agreement with the literature.<sup>15</sup>

#### 1,3-Dimethoxy-5-phenoxybenzene(**3d**)

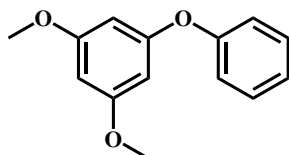

General procedure was used with 1-iodo-3,5-dimethoxybenzene (1.8 mmol, 475.3 mg), phenol (1.2 mmol, 94.11 mg). Reaction ran for 24 h at 85 °C. The product was isolated by preparative thin-layer chromatography with petroleum ether and ethyl acetate (50:1 (v/v)), affording **3d** in 61% yield (174.3 mg) as a colorless solid.

$R_f = 0.30$  (petroleum ether/ ethyl acetate 20:1 (v/v)). **NMR Spectroscopy:**  $^1\text{H NMR}$  (600 MHz,  $\text{CDCl}_3$ )  $\delta$  7.38 – 7.34 (m, 2H), 7.14 (m, 1H), 7.08 – 7.05 (m, 2H), 6.25 (m, 1H), 6.21 – 6.19 (d,  $J = 2.2$  Hz, 2H), 3.77 (s, 6H). The compound data was in agreement with the literature.<sup>16</sup>

#### 2-Phoxynaphthalene(**3e**)

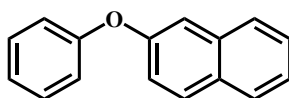

General procedure was used with iodobenzene (1.8 mmol, 167.8  $\mu\text{L}$ ), naphthalen-2-ol (1.2 mmol, 173 mg). Reaction ran for 24 h at 85 °C. The product was isolated by preparative thin-layer chromatography with petroleum ether and ethyl acetate (50:1 (v/v)), affording **3e** in 74% yield (189.7 mg) as a colorless solid.

$R_f = 0.30$  (petroleum ether/ ethyl acetate 20:1 (v/v)). **NMR Spectroscopy:**  $^1\text{H NMR}$  (600 MHz,  $\text{CDCl}_3$ )  $\delta$  7.88 – 7.83 (m, 2H), 7.75 – 7.71 (d,  $J = 8.1$  Hz, 1H), 7.50 – 7.29 (m, 6H), 7.19 – 7.08 (m, 3H). The compound data was in agreement with the literature.<sup>17</sup>

#### 4-Allyl-2-methoxy-1-phenoxybenzene(**3f**)

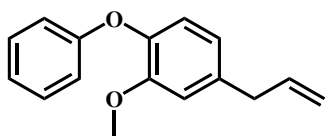

General procedure was used with iodobenzene (1.8 mmol, 167.8  $\mu$ L), 4-allyl-2-methoxyphenol (1.2 mmol, 184.7  $\mu$ L). Reaction ran for 24 h at 85  $^{\circ}$ C. The product was isolated by preparative thin-layer chromatography with petroleum ether and ethyl acetate (50:1 (v/v)), affording **3f** in 70% yield (201.8 mg) as a yellow liquid.

$R_f$  = 0.30 (petroleum ether/ ethyl acetate 20:1 (v/v)). **NMR Spectroscopy:**  $^1\text{H NMR}$  (600 MHz,  $\text{CDCl}_3$ )  $\delta$  7.35 – 7.26 (m, 2H), 7.05 (m, 1H), 6.98 – 6.93 (m, 3H), 6.85 (s, 1H), 6.79 – 6.76 (d,  $J$  = 7.7 Hz, 1H), 6.02 (m, 1H), 5.17 – 5.11 (m, 2H), 3.85 (s, 3H), 3.44 – 3.40 (d,  $J$  = 6.7 Hz, 2H). The compound data was in agreement with the literature.<sup>18</sup>

#### 1-Methoxy-4-phenoxybenzene(**3g**)

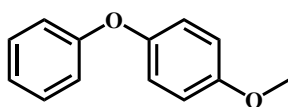

General procedure was used with iodobenzene (1.8 mmol, 167.8  $\mu$ L), 4-methoxyphenol (1.2 mmol, 149 mg). Reaction ran for 24 h at 85  $^{\circ}$ C. The product was isolated by preparative thin-layer chromatography with petroleum ether and ethyl acetate (50:1 (v/v)), affording **3g** in 61% yield (146 mg) as a yellow solid.

$R_f$  = 0.30 (petroleum ether/ ethyl acetate 20:1 (v/v)). **NMR Spectroscopy:**  $^1\text{H NMR}$  (600 MHz,  $\text{CDCl}_3$ )  $\delta$  7.32 – 7.28 (m, 2H), 7.04 (m, 1H), 7.00 – 6.93 (m, 4H), 6.90 – 6.87 (m, 2H), 3.81 (s, 3H). The compound data was in agreement with the literature.<sup>19</sup>

#### Compound **3h**

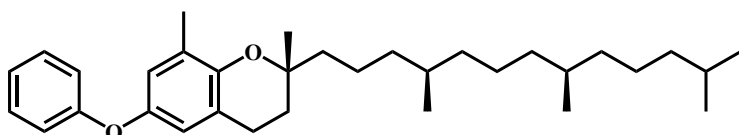

General procedure was used with iodobenzene (1.8 mmol, 167.8  $\mu$ L), D- $\delta$ -Tocopherol (1.2 mmol, 486.6  $\mu$ L). Reaction ran for 24 h at 85  $^{\circ}$ C. The product was isolated by preparative thin-layer chromatography with petroleum ether and ethyl acetate (50:1 (v/v)), affording **3h** in 42% yield (241 mg) as a yellow liquid.

$R_f$  = 0.30 (petroleum ether/ ethyl acetate 20:1 (v/v)). **NMR Spectroscopy:**  $^1\text{H NMR}$  (600 MHz,  $\text{CDCl}_3$ )  $\delta$  7.33 – 7.29 (m, 2H), 7.06 – 7.02 (m, 1H), 6.98 – 6.95 (d,  $J$  = 7.9 Hz, 2H), 6.71 – 6.67 (d,  $J$  = 2.1 Hz, 1H), 6.63 – 6.60 (d,  $J$  = 2.1 Hz, 1H), 2.80 – 2.67 (m, 2H), 2.16 (s, 3H), 1.87 – 1.73 (m, 2H), 1.65 – 1.50 (m, 4H), 1.43 – 1.33 (m, 4H), 1.34 – 1.24 (m, 10H), 1.18 – 1.12 (m, 3H), 1.11 – 1.04 (m, 3H), 0.91 – 0.85 (m, 12H).  $^{13}\text{C NMR}$  (151 MHz,  $\text{CDCl}_3$ )  $\delta$  159.0, 148.5, 148.4, 129.6, 127.7, 122.1, 121.5, 120.2, 117.7, 177.6, 76.0, 40.2, 39.5, 37.6, 37.5, 37.4, 32.9, 32.8, 31.3, 28.1, 24.9, 24.6, 24.3, 22.8, 22.7, 22.6, 21.1, 19.9, 19.8, 16.3.

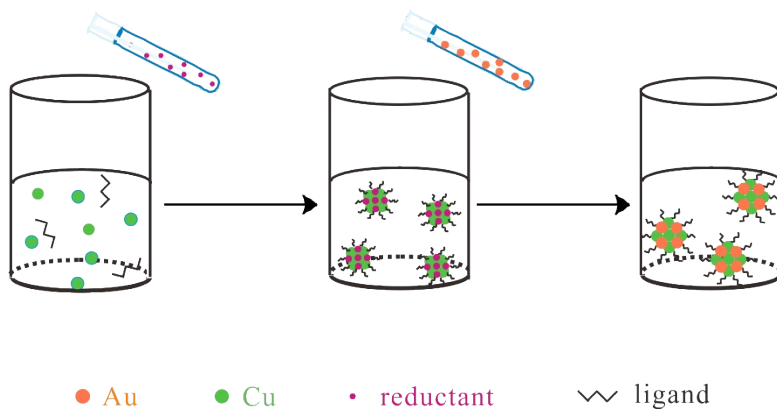

**Figure S1.** The synthetic strategy of Au<sub>41</sub>Cu<sub>33</sub> clusters.

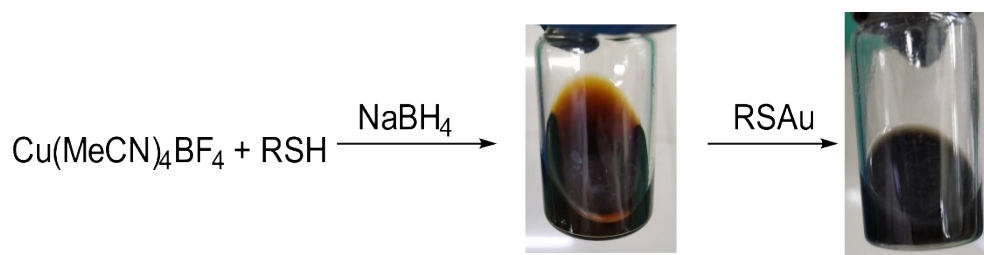

**Figure S2.** The synthetic procedure of Au<sub>41</sub>Cu<sub>33</sub> clusters.

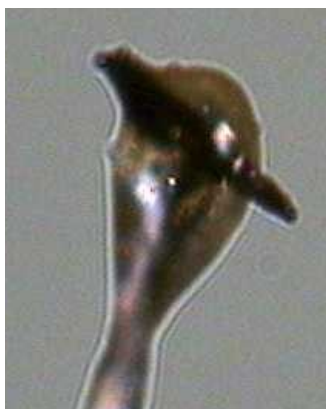

**Figure S3.** The digital images of Au<sub>41</sub>Cu<sub>33</sub> crystals.

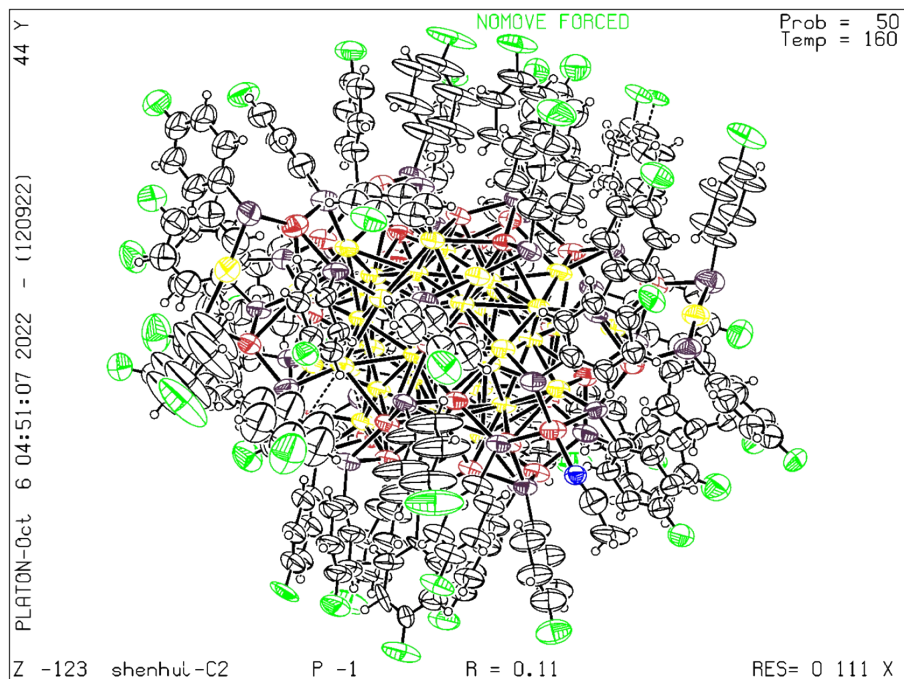

**Figure S4.** The thermal ellipsoids of the ORTEP diagram of  $\text{Au}_{41}\text{Cu}_{33}$ .

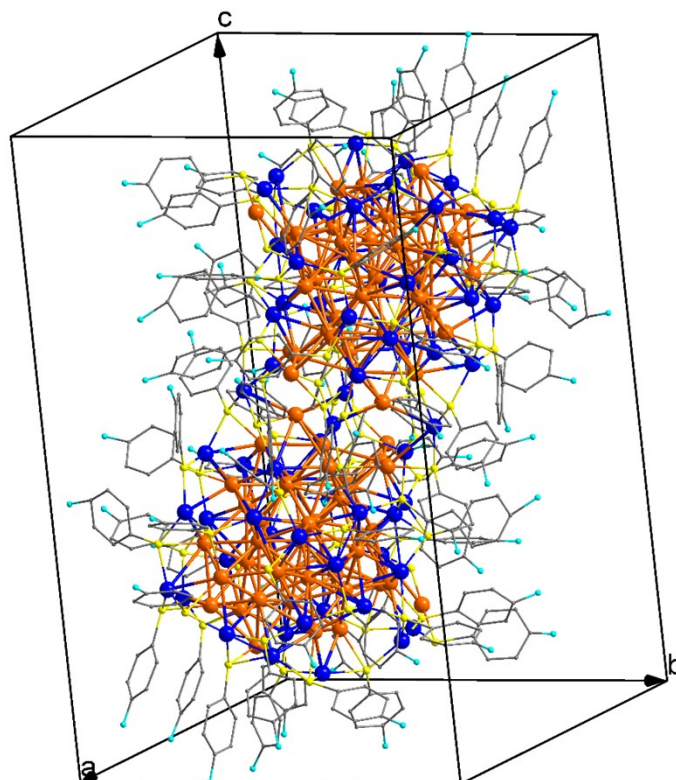

**Figure S5.** The packing structure of  $\text{Au}_{41}\text{Cu}_{33}(\text{RS})_{40}(\text{MeCN})$  clusters in their single crystals. Color legend: orange spheres, Au; blue spheres, Cu; pink spheres, P; turquoise spheres, Cl; pale green spheres, F; yellow spheres, B; gray spheres, C. All hydrogen atoms are omitted for clarity.

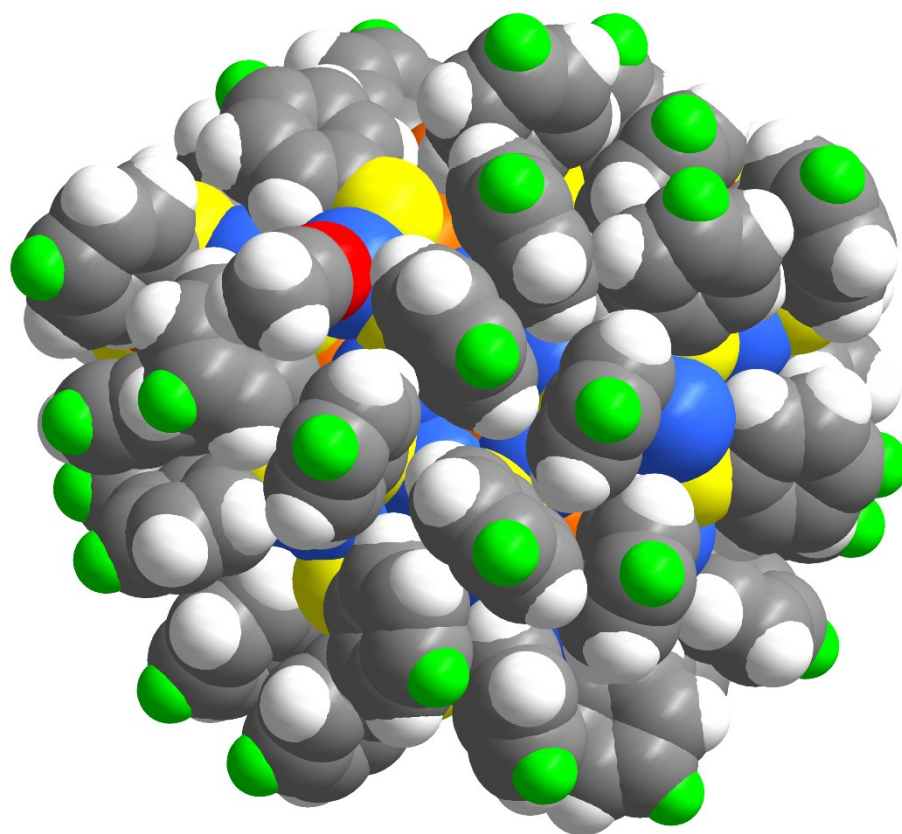

~2.4 nm

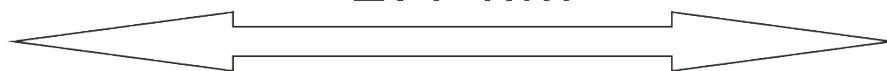

**Figure S6.** Total structure of  $\text{Au}_{41}\text{Cu}_{33}(\text{RS})_{40}(\text{MeCN})$ . Color legend: orange spheres, Au; blue spheres, Cu; pink spheres, P; turquoise, Cl; gray spheres, C. All hydrogen atoms are omitted for clarity.



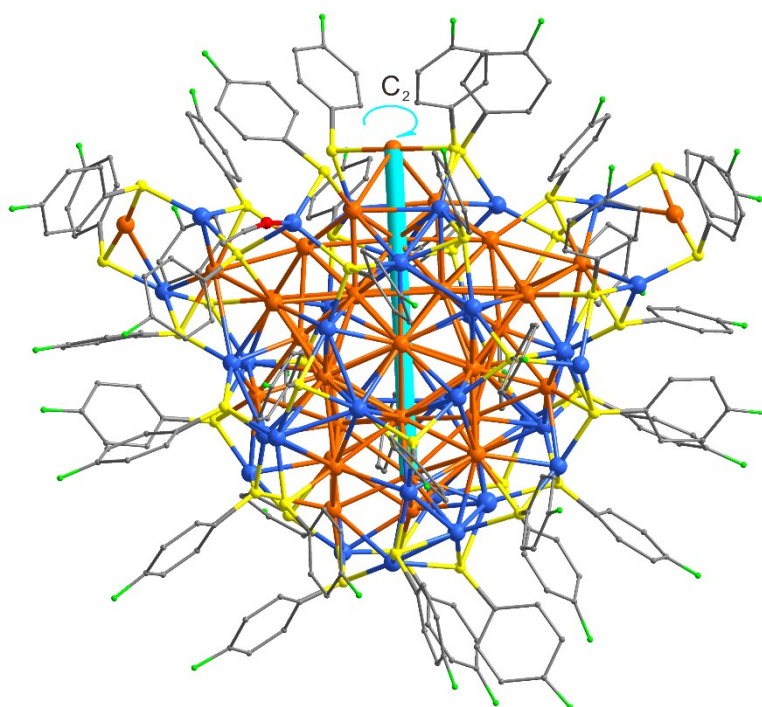

**Figure S7.** A  $C_2$  axis is present in the structure of  $Au_{41}Cu_{33}(RS)_{40}(MeCN)$ . Color legend: orange spheres, Au; blue spheres, Cu; pink spheres, P; turquoise, Cl; gray spheres, C. All hydrogen atoms are omitted for clarity.

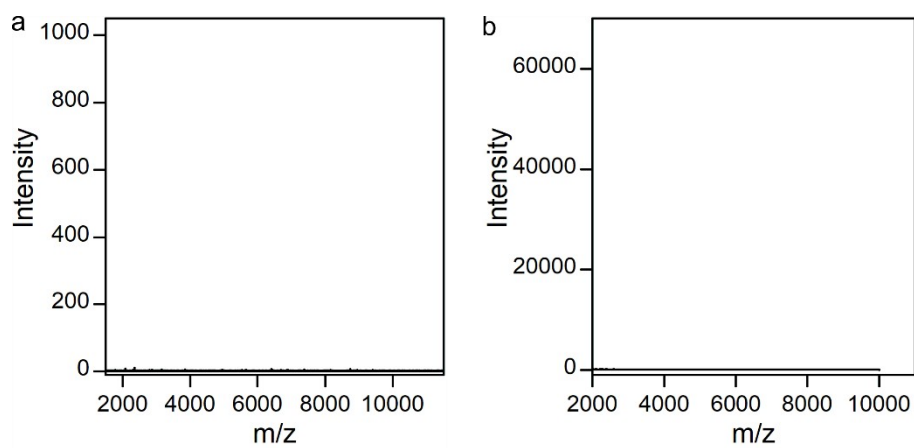

**Figure S8.** ESI-MS of  $Au_{41}Cu_{33}(RS)_{40}(MeCN)$  in the positive (a) and negative mode (b).

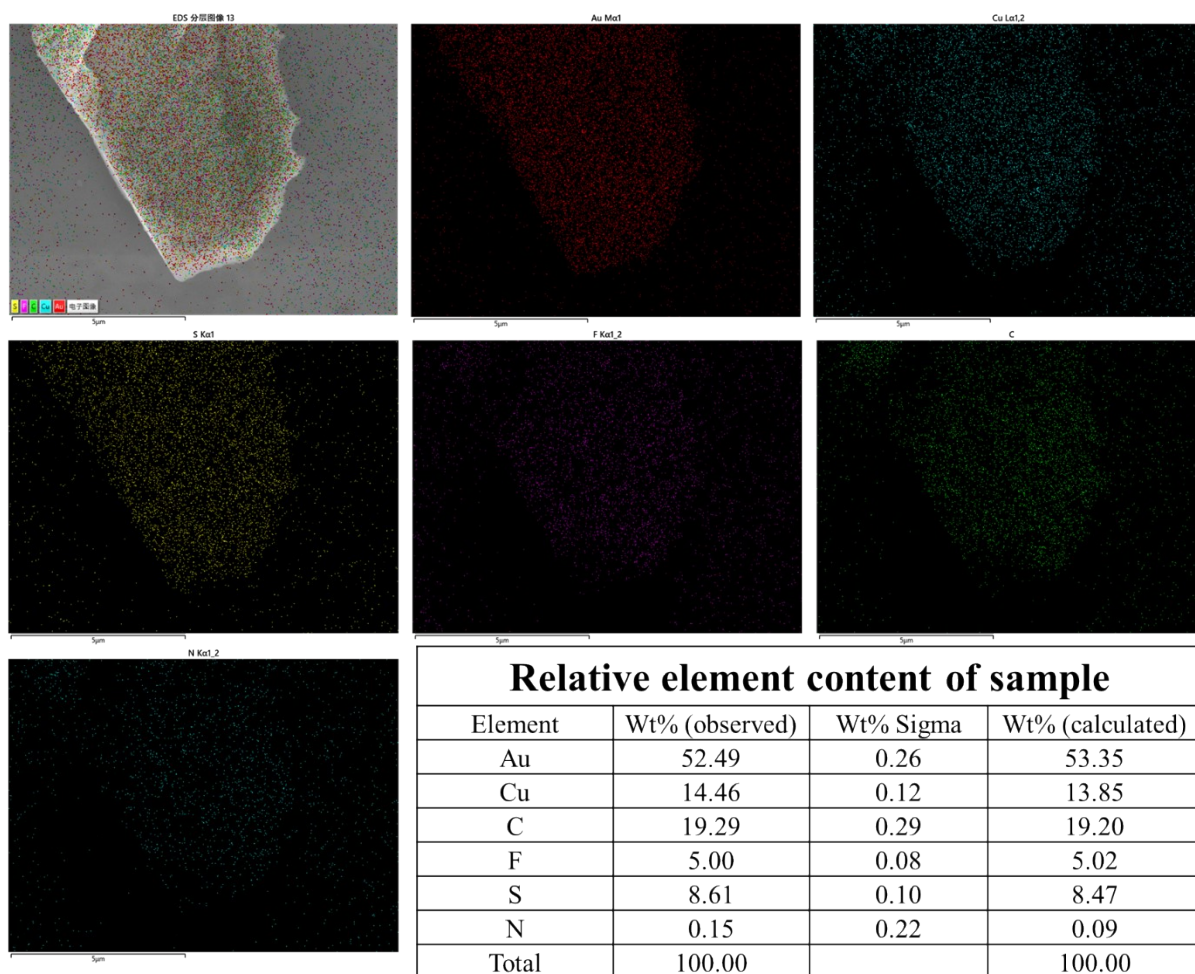

**Figure S9.** Elemental maps and relative element content of samples determined from energy-dispersive X-ray spectra.

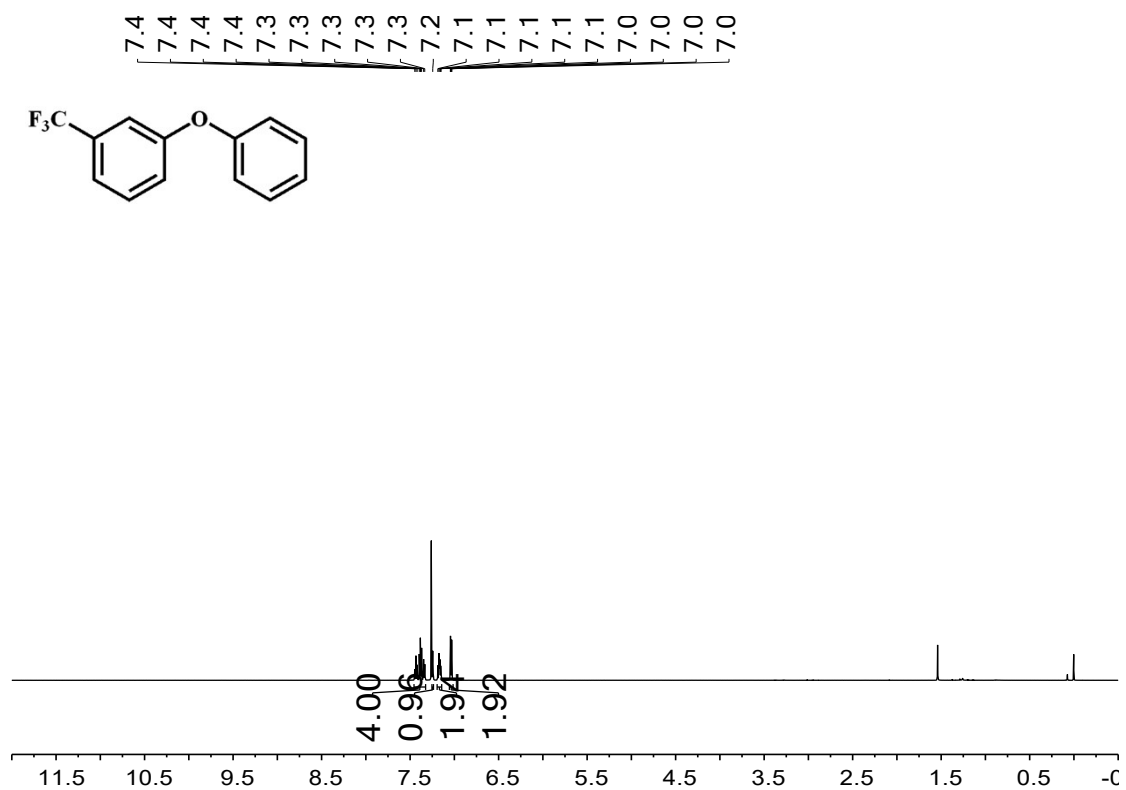

**Figure S10.** <sup>1</sup>H NMR spectrum (600 MHz, CDCl<sub>3</sub>, 23 °C) of **3a**.

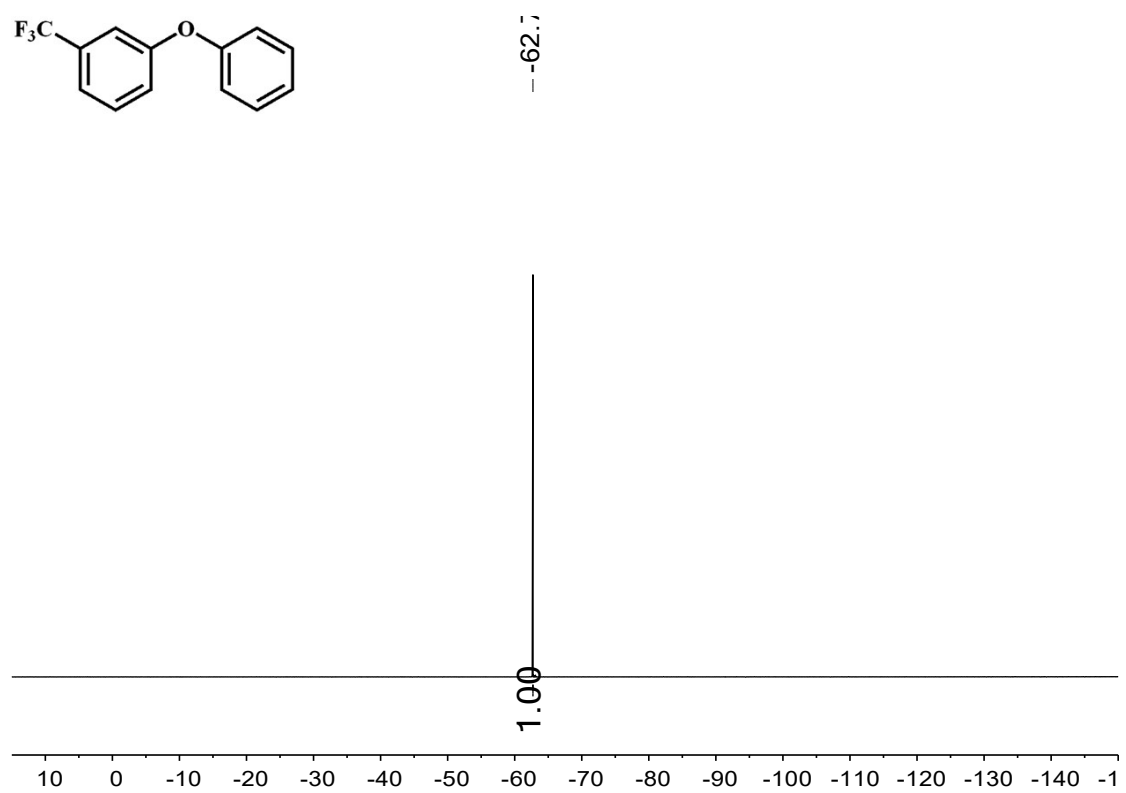

**Figure S11.** <sup>19</sup>F NMR spectrum (565 MHz, CDCl<sub>3</sub>, 23 °C) of **3a**.

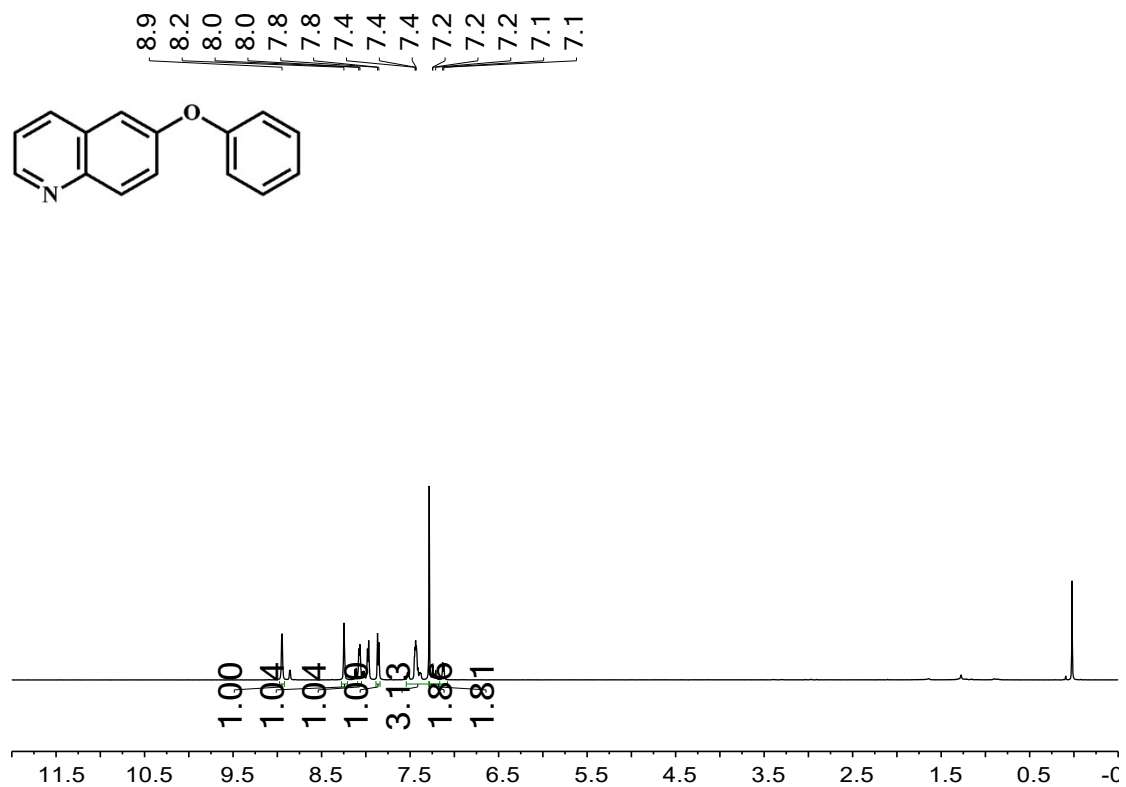

**Figure S12.** <sup>1</sup>H NMR spectrum (600 MHz, CDCl<sub>3</sub>, 23 °C) of **3b**.

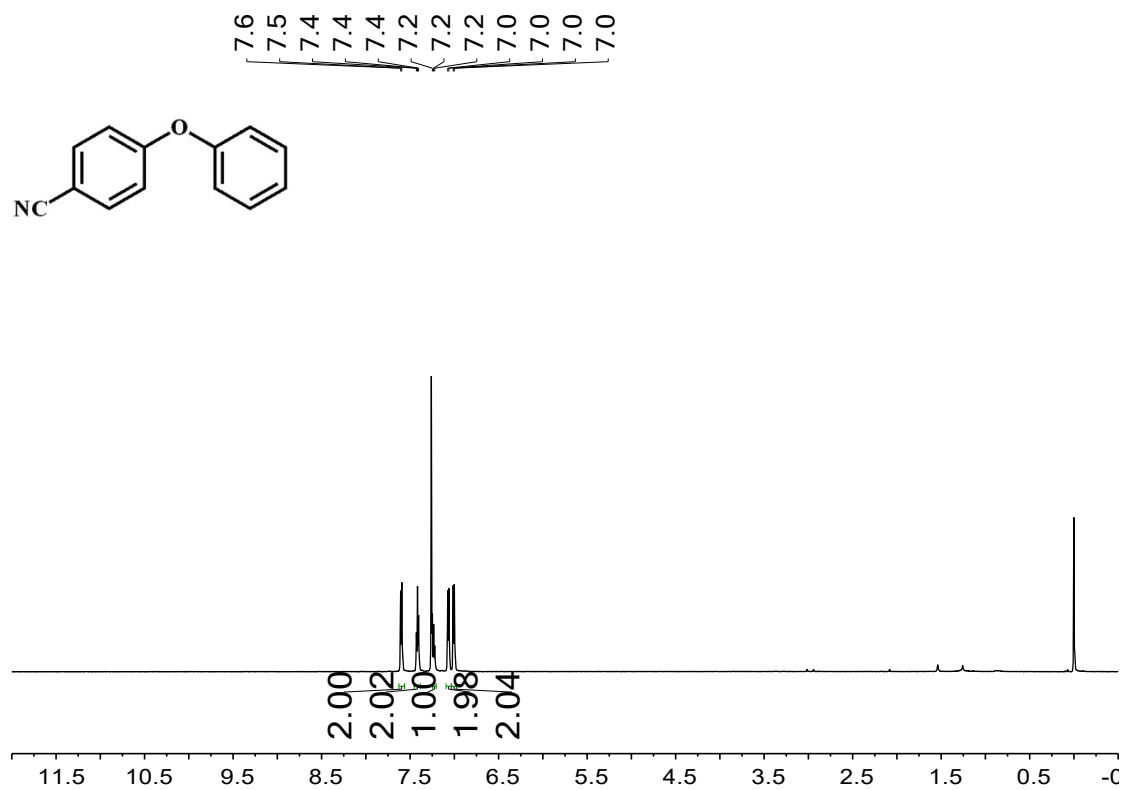

**Figure S13.** <sup>1</sup>H NMR spectrum (600 MHz, CDCl<sub>3</sub>, 23 °C) of **3c**.

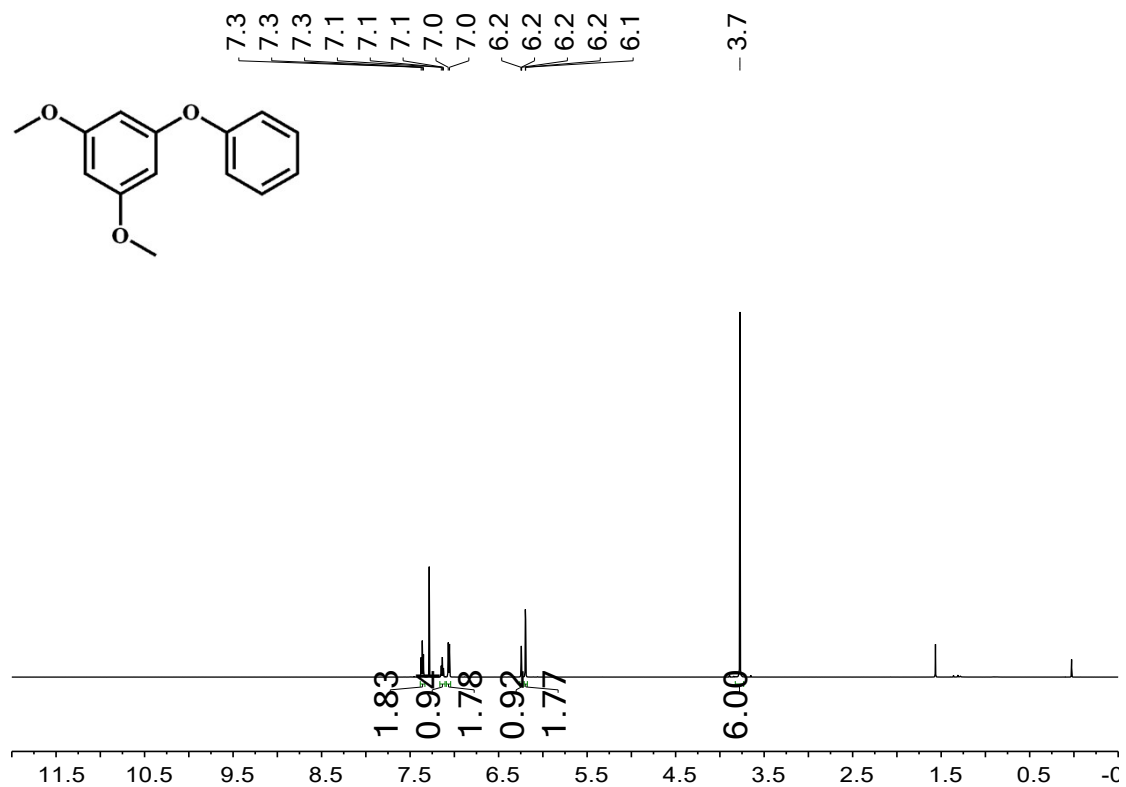

**Figure S14.**  $^1\text{H}$  NMR spectrum (600 MHz,  $\text{CDCl}_3$ , 23  $^\circ\text{C}$ ) of **3d**.

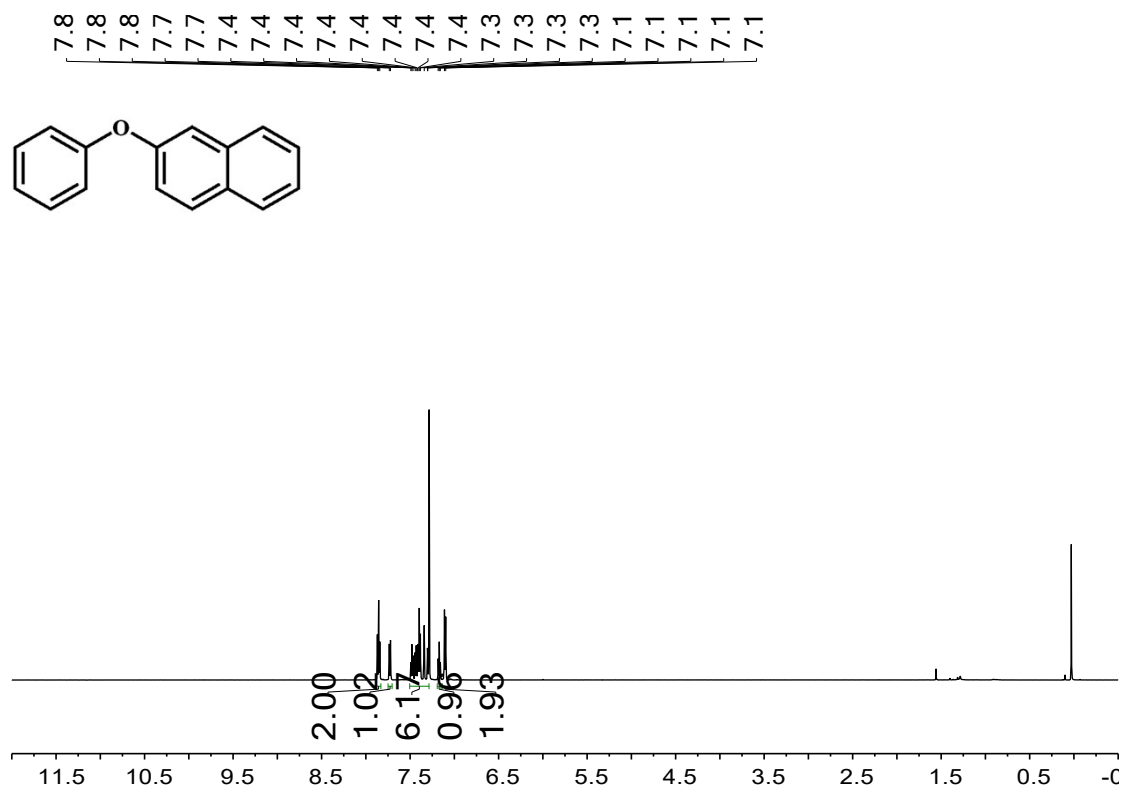

**Figure S15.**  $^1\text{H}$  NMR spectrum (600 MHz,  $\text{CDCl}_3$ , 23  $^\circ\text{C}$ ) of **3e**.

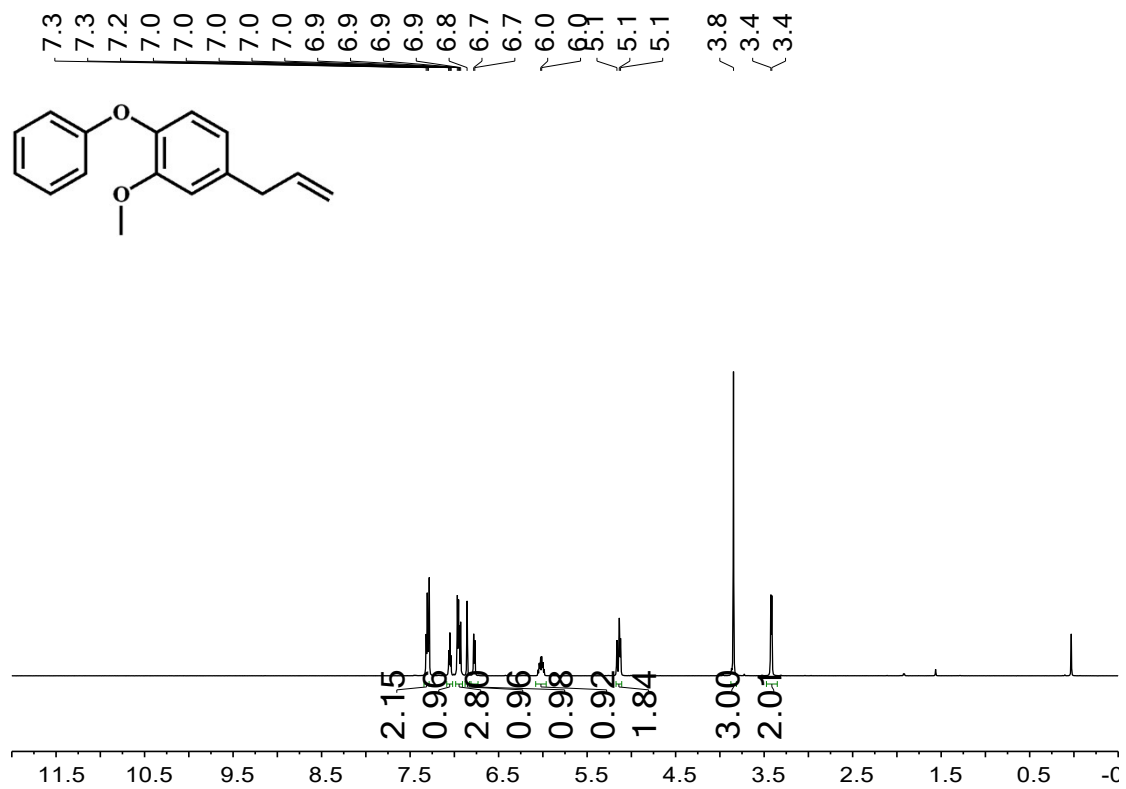

**Figure S16.**  $^1\text{H}$  NMR spectrum (600 MHz,  $\text{CDCl}_3$ , 23  $^\circ\text{C}$ ) of **3f**.

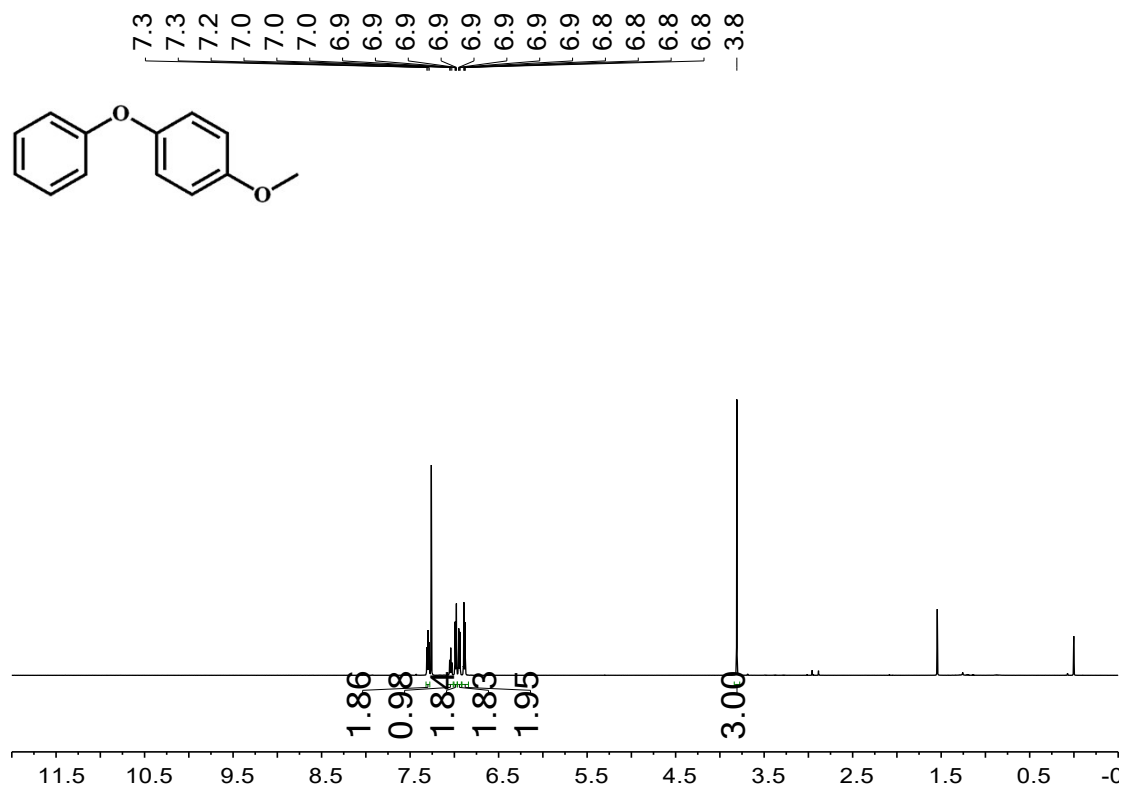

**Figure S17.**  $^1\text{H}$  NMR spectrum (600 MHz,  $\text{CDCl}_3$ , 23  $^\circ\text{C}$ ) of **3g**.

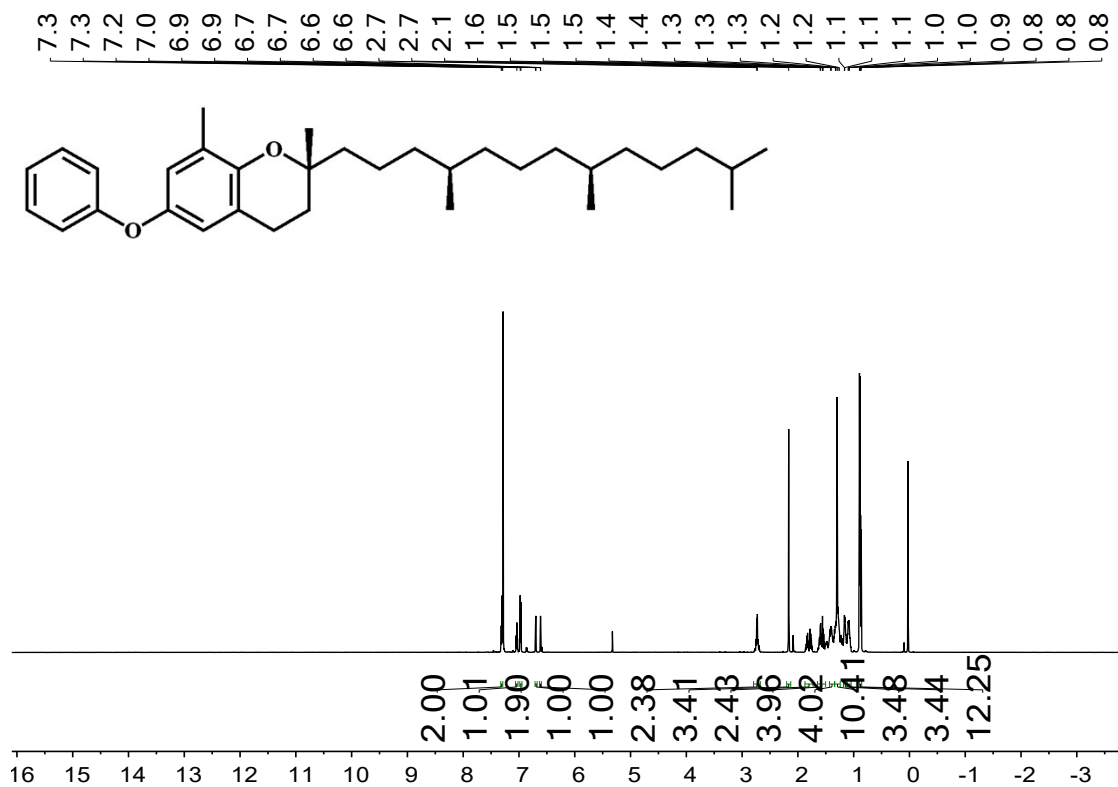

**Figure S18.** <sup>1</sup>H NMR spectrum (600 MHz, CDCl<sub>3</sub>, 23 °C) of **3h**.

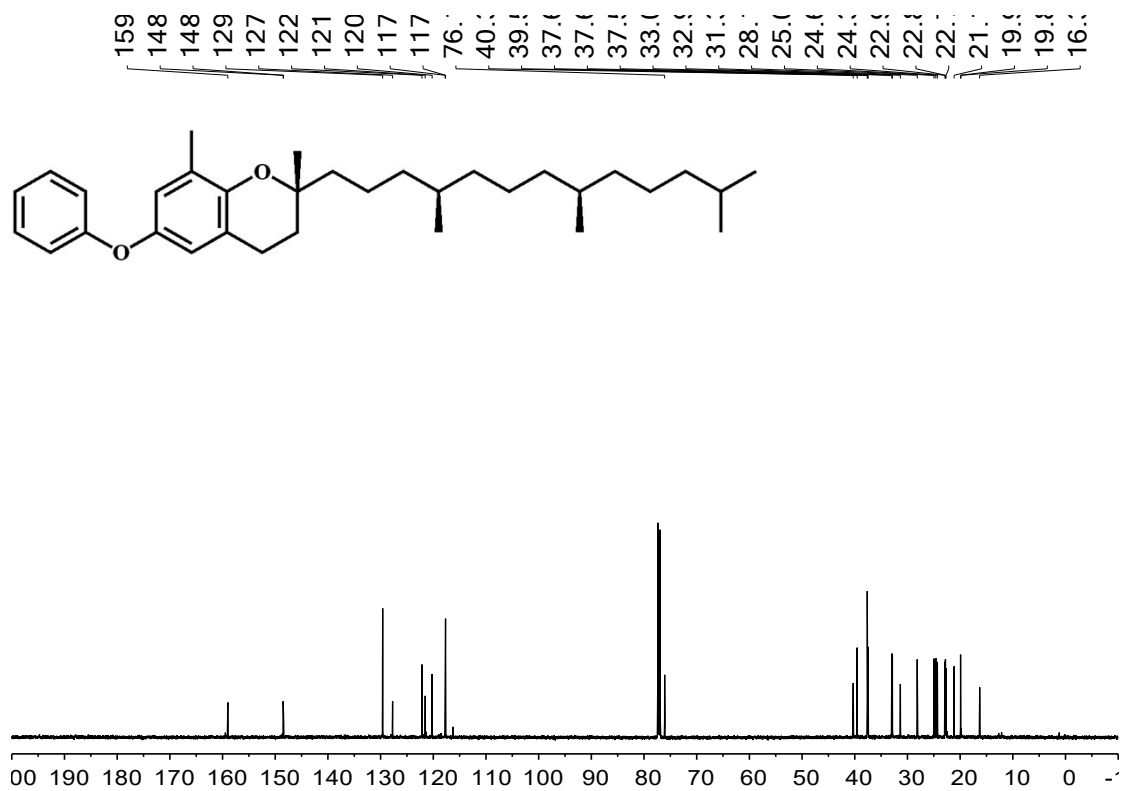

**Figure S19.** <sup>13</sup>C NMR spectrum (151 MHz, CDCl<sub>3</sub>, 23 °C) of **3h**.

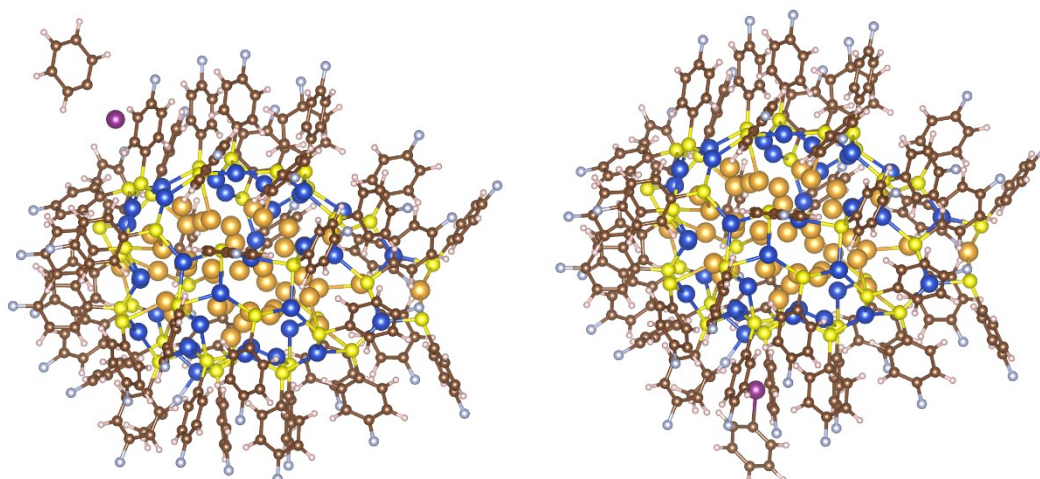

**Figure S20.** The illustration of  $C_6H_5-I$  adsorbed at the uncoordinated copper site (left) and other Cu sites (right).

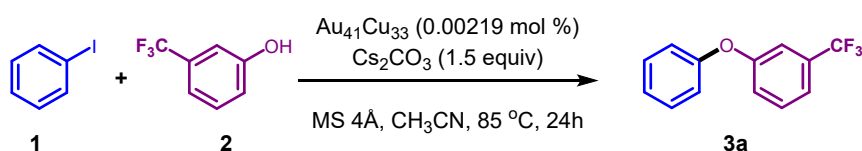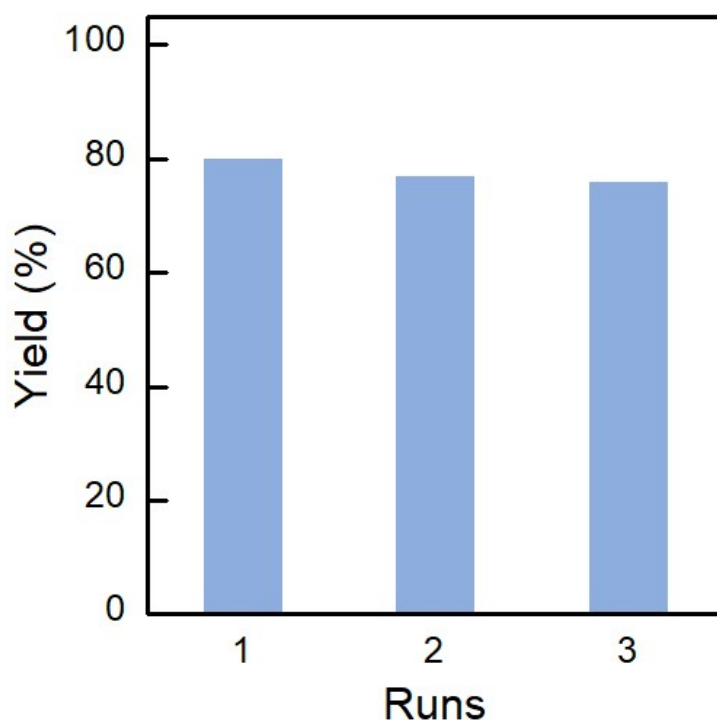

**Figure S21.** The activity of the recycled  $Au_{41}Cu_{33}(RS)_{40}(MeCN)/XC-72$  for C-O bond coupling reaction. Reaction conditions:  $Au_{41}Cu_{33}$  (0.00219 mol%), **1** (1.8 mmol, 1.2 equiv), **2** (1.2 mmol, 1 equiv), MS 4Å (20 mg), in  $CH_3CN$  (1.2 mL), stirred at 85 °C for 24 h. The yield of **3a** was determined by  $^{19}F$  NMR.



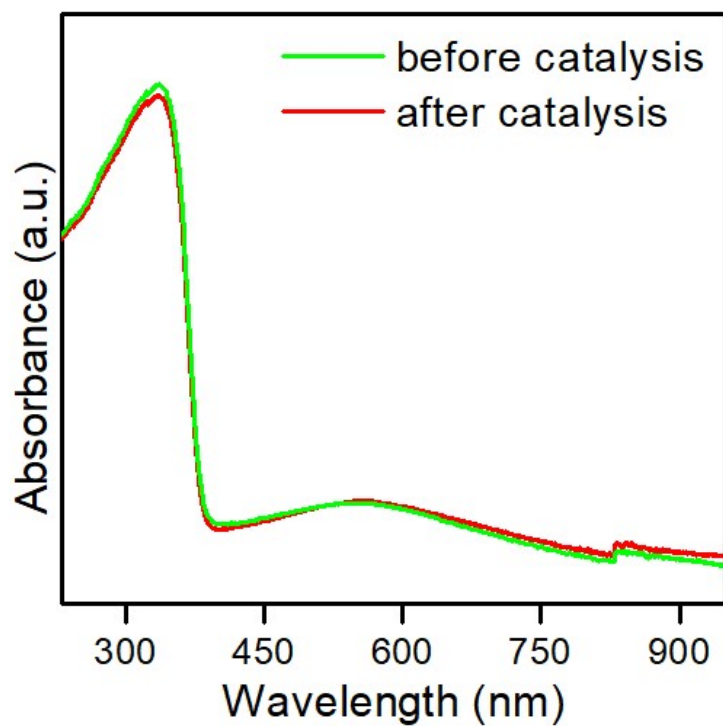

**Figure S22.** Solid-state UV-Vis spectra of  $\text{Au}_{41}\text{Cu}_{33}(\text{RS})_{40}(\text{MeCN})/\text{TiO}_2$  before and after catalysis.

**Table S1. Crystal data and structure refinement for  $\text{Au}_{41}\text{Cu}_{33}(\text{RS})_{40}(\text{MeCN})$ .**

|                                           |                                                                                                            |
|-------------------------------------------|------------------------------------------------------------------------------------------------------------|
| Identification code                       | Au <sub>41</sub> Cu <sub>33</sub> (RS) <sub>40</sub> (MeCN)                                                |
| Empirical formula                         | C <sub>242</sub> H <sub>163</sub> Au <sub>40.39</sub> Cu <sub>33.61</sub> F <sub>40</sub> NS <sub>40</sub> |
| Formula weight                            | 15218.18                                                                                                   |
| Temperature/K                             | 160.01(10)                                                                                                 |
| Crystal system                            | triclinic                                                                                                  |
| Space group                               | P-1                                                                                                        |
| a/Å                                       | 21.5779(10)                                                                                                |
| b/Å                                       | 23.5644(12)                                                                                                |
| c/Å                                       | 35.2515(16)                                                                                                |
| α/°                                       | 77.995(4)                                                                                                  |
| β/°                                       | 76.716(4)                                                                                                  |
| γ/°                                       | 79.904(4)                                                                                                  |
| Volume/Å <sup>3</sup>                     | 16909.5(15)                                                                                                |
| Z                                         | 2                                                                                                          |
| ρ <sub>calc</sub> /g/cm <sup>3</sup>      | 2.989                                                                                                      |
| μ/mm <sup>-1</sup>                        | 36.982                                                                                                     |
| F(000)                                    | 13575                                                                                                      |
| Crystal size/mm <sup>3</sup>              | 0.5 × 0.05 × 0.05                                                                                          |
| Radiation                                 | CuKα (λ = 1.54184)                                                                                         |
| 2θ range for data collection/°            | 3.296 to 61.168                                                                                            |
| Index ranges                              | -24 ≤ h ≤ 22, -26 ≤ k ≤ 26, -40 ≤ l ≤ 32                                                                   |
| Independent reflections                   | 109178 [R <sub>int</sub> = 0.1725, R <sub>sigma</sub> = 0.2093]                                            |
| Data/restraints/parameters                | 51944/1958/3209                                                                                            |
| Goodness-of-fit on F <sup>2</sup>         | 0.937                                                                                                      |
| Final R indexes [I ≥ 2σ (I)]              | R <sub>1</sub> = 0.1083, wR <sub>2</sub> = 0.2540                                                          |
| Final R indexes [all data]                | R <sub>1</sub> = 0.1908, wR <sub>2</sub> = 0.3389                                                          |
| Largest diff. peak/hole/e Å <sup>-3</sup> | 5.67/-3.36                                                                                                 |

**Table S2.** The coordinates and Mulliken charge of each atom in Au<sub>41</sub>Cu<sub>33</sub> cluster.

| atom | x        | y        | z        | charge |
|------|----------|----------|----------|--------|
| Au   | 35.99037 | 19.5891  | 35.35152 | 0.051  |
| Au   | 32.55088 | 19.4962  | 38.27537 | 0.046  |
| Au   | 32.00708 | 22.12554 | 36.451   | 0.033  |
| Au   | 34.95527 | 19.0165  | 40.03305 | 0.006  |
| Au   | 37.33157 | 21.35476 | 33.19763 | 0.109  |
| Au   | 33.77528 | 21.71343 | 40.67554 | 0.059  |
| Au   | 34.65256 | 19.10708 | 32.7029  | 0.098  |
| Au   | 36.96987 | 21.17554 | 40.61409 | 0.013  |
| Au   | 33.94017 | 24.26437 | 35.70395 | 0.015  |
| Au   | 30.01558 | 19.78631 | 36.73995 | 0.131  |
| Au   | 40.60245 | 22.86057 | 37.12425 | 0.118  |
| Au   | 38.63726 | 18.58964 | 34.23988 | 0.115  |
| Au   | 35.84081 | 23.90718 | 40.63426 | 0.043  |
| Au   | 39.71019 | 20.5289  | 39.13277 | 0.107  |
| Au   | 35.93169 | 25.01749 | 37.75887 | 0.034  |
| Au   | 32.19443 | 19.20567 | 41.21198 | 0.070  |
| Au   | 38.90105 | 23.45396 | 41.02789 | 0.103  |
| Au   | 31.14028 | 25.12473 | 36.87095 | 0.085  |
| Au   | 33.22541 | 24.01541 | 38.67161 | 0.043  |
| Au   | 41.30548 | 20.33648 | 34.91322 | 0.207  |
| Au   | 32.89323 | 24.50022 | 41.55995 | 0.091  |
| Au   | 37.90329 | 18.41989 | 40.97782 | 0.114  |
| Au   | 32.02544 | 23.568   | 33.56355 | 0.132  |
| Au   | 35.30322 | 20.01348 | 42.81523 | 0.135  |
| Au   | 30.99778 | 21.61134 | 39.40167 | 0.009  |
| Au   | 35.50909 | 24.08534 | 32.92082 | 0.115  |
| Au   | 35.27026 | 21.49468 | 30.8411  | 0.159  |
| Au   | 34.90968 | 21.51732 | 37.66833 | -0.028 |
| Au   | 38.62513 | 20.88713 | 36.09879 | 0.046  |
| Au   | 32.7938  | 19.45784 | 35.23361 | 0.045  |
| Au   | 36.68238 | 23.06587 | 35.53761 | 0.020  |
| Au   | 34.29387 | 21.71828 | 34.12077 | 0.001  |
| Au   | 37.82429 | 22.8147  | 38.31914 | 0.041  |
| Au   | 34.61781 | 17.76756 | 37.27153 | 0.055  |
| Au   | 37.17528 | 19.33796 | 38.14185 | 0.025  |
| Au   | 30.38074 | 24.37624 | 39.92303 | 0.125  |
| Au   | 39.91454 | 20.77151 | 42.29367 | 0.176  |
| Au   | 29.12765 | 22.73179 | 37.36026 | 0.160  |
| Au   | 35.58138 | 21.71966 | 27.60777 | 0.234  |
| Au   | 42.32122 | 20.41174 | 44.56515 | 0.248  |
| Cu   | 30.08035 | 18.48462 | 39.38084 | 0.022  |
| Cu   | 39.34122 | 23.2372  | 34.5296  | 0.012  |
| Cu   | 34.58372 | 22.89555 | 43.13842 | -0.025 |
| Cu   | 29.66663 | 25.03744 | 34.39893 | 0.045  |
| Cu   | 34.95675 | 25.96367 | 42.72546 | 0.07   |
| Cu   | 33.66885 | 26.61659 | 37.04643 | 0.006  |
| Cu   | 39.37032 | 18.6466  | 44.44434 | 0.052  |

---

|    |          |          |          |        |
|----|----------|----------|----------|--------|
| Cu | 29.60966 | 20.2588  | 41.45715 | 0.055  |
| Cu | 31.60994 | 26.99114 | 40.68142 | 0.073  |
| Cu | 28.36951 | 25.62477 | 38.26858 | 0.061  |
| Cu | 42.57608 | 22.3631  | 42.20369 | 0.038  |
| Cu | 41.50827 | 24.85243 | 39.25456 | 0.059  |
| Cu | 28.09453 | 22.00404 | 40.02563 | 0.046  |
| Cu | 34.17127 | 24.13418 | 29.50312 | 0.042  |
| Cu | 39.51331 | 18.2538  | 37.04543 | 0.020  |
| Cu | 36.36331 | 25.88875 | 35.09484 | 0.018  |
| Cu | 37.18968 | 17.20112 | 36.29992 | -0.006 |
| Cu | 30.60813 | 21.13588 | 34.13897 | -0.006 |
| Cu | 31.86715 | 17.22156 | 36.63285 | -0.011 |
| Cu | 36.36339 | 16.67084 | 39.14232 | 0.017  |
| Cu | 33.34569 | 16.84205 | 39.67676 | 0.004  |
| Cu | 38.55045 | 24.9205  | 36.59679 | 0.003  |
| Cu | 32.41865 | 21.0087  | 32.286   | -0.024 |
| Cu | 34.6944  | 26.37594 | 39.85923 | -0.004 |
| Cu | 37.05688 | 22.38144 | 43.04122 | -0.01  |
| Cu | 30.15291 | 18.07491 | 34.41135 | 0.024  |
| Cu | 34.09719 | 17.05813 | 34.68107 | 0.011  |
| Cu | 31.33796 | 22.22718 | 42.16467 | 0.000  |
| Cu | 36.64805 | 19.10831 | 29.37155 | 0.068  |
| Cu | 36.98709 | 15.83106 | 32.24437 | 0.220  |
| Cu | 32.64637 | 19.4167  | 44.01    | 0.046  |
| Cu | 33.34904 | 26.21356 | 33.07018 | 0.095  |
| Cu | 37.72731 | 25.78024 | 39.68437 | 0.006  |
| Cu | 35.82998 | 16.90048 | 42.90603 | 0.104  |
| S  | 38.45766 | 16.22633 | 38.10778 | 0.170  |
| S  | 42.03832 | 20.70109 | 40.57249 | 0.066  |
| S  | 38.56369 | 25.5553  | 34.2711  | 0.164  |
| S  | 32.75658 | 22.38417 | 30.37951 | 0.122  |
| S  | 31.2085  | 16.44789 | 38.77254 | 0.207  |
| S  | 28.68986 | 26.39214 | 36.08236 | 0.134  |
| S  | 42.7782  | 24.40602 | 37.41665 | 0.110  |
| S  | 33.01567 | 27.78634 | 38.9199  | 0.164  |
| S  | 40.69955 | 22.04884 | 33.06489 | 0.097  |
| S  | 30.41825 | 18.99353 | 43.39781 | 0.132  |
| S  | 35.03438 | 15.76647 | 40.94695 | 0.161  |
| S  | 36.2134  | 24.43825 | 44.01564 | 0.183  |
| S  | 28.06318 | 18.63689 | 35.21644 | 0.095  |
| S  | 31.00213 | 26.10742 | 32.79093 | 0.126  |
| S  | 41.43397 | 24.26285 | 41.49949 | 0.113  |
| S  | 28.92887 | 22.79489 | 34.57353 | 0.095  |
| S  | 39.61705 | 26.14519 | 38.38214 | 0.146  |
| S  | 32.83728 | 27.08735 | 42.70602 | 0.115  |
| S  | 29.34042 | 26.93862 | 40.08096 | 0.105  |
| S  | 27.02365 | 23.77897 | 38.9161  | 0.127  |
| S  | 34.42582 | 17.9474  | 44.47084 | 0.154  |
| S  | 34.59493 | 25.80101 | 31.04546 | 0.122  |
| S  | 32.71354 | 21.82419 | 44.13496 | 0.140  |

---

---

|   |          |          |          |        |
|---|----------|----------|----------|--------|
| S | 36.53673 | 27.0727  | 41.25901 | 0.163  |
| S | 28.02025 | 19.57228 | 39.69881 | 0.163  |
| S | 31.82224 | 16.38262 | 34.38943 | 0.187  |
| S | 35.72736 | 17.52877 | 30.81487 | 0.053  |
| S | 39.15927 | 16.53074 | 32.66409 | 0.070  |
| S | 30.70645 | 19.40003 | 32.4455  | 0.172  |
| S | 36.12171 | 15.87646 | 34.63653 | 0.126  |
| S | 37.89852 | 20.70154 | 30.63415 | 0.071  |
| S | 41.77658 | 18.82178 | 36.97363 | 0.075  |
| S | 38.25288 | 20.84815 | 44.4449  | 0.102  |
| S | 28.99745 | 22.63875 | 42.1574  | 0.169  |
| S | 38.22985 | 17.03092 | 43.25369 | 0.097  |
| S | 40.95757 | 18.78343 | 46.07365 | 0.095  |
| S | 34.46922 | 27.29889 | 34.92007 | 0.170  |
| S | 36.90928 | 19.54619 | 27.13295 | 0.100  |
| S | 44.29161 | 21.85476 | 43.62928 | 0.097  |
| S | 34.2722  | 23.93867 | 27.22415 | 0.091  |
| F | 40.67718 | 25.10506 | 27.57418 | -0.319 |
| F | 29.24611 | 10.72424 | 38.66805 | -0.305 |
| F | 38.29017 | 30.4498  | 29.96334 | -0.312 |
| F | 41.19105 | 19.03966 | 27.55995 | -0.326 |
| F | 34.41093 | 33.65143 | 38.62654 | -0.307 |
| F | 26.49901 | 19.52474 | 28.12876 | -0.313 |
| F | 22.50236 | 22.72924 | 35.05912 | -0.313 |
| F | 29.08577 | 13.11099 | 43.5513  | -0.318 |
| F | 47.39604 | 20.77325 | 38.81335 | -0.323 |
| F | 25.41    | 14.17656 | 38.3169  | -0.320 |
| F | 30.15516 | 32.24999 | 35.74119 | -0.320 |
| F | 25.34979 | 22.47624 | 46.97475 | -0.311 |
| F | 44.58574 | 15.38807 | 41.90867 | -0.317 |
| F | 38.11761 | 28.20098 | 25.32476 | -0.317 |
| F | 30.567   | 19.12346 | 25.78366 | -0.315 |
| F | 31.22167 | 14.64839 | 27.99702 | -0.314 |
| F | 33.48364 | 16.07672 | 23.56403 | -0.317 |
| F | 41.05361 | 24.50281 | 48.37251 | -0.317 |
| F | 23.73126 | 22.38614 | 31.53403 | -0.312 |
| F | 37.19602 | 19.44205 | 49.61878 | -0.320 |
| F | 34.10623 | 9.814181 | 41.49084 | -0.308 |
| F | 41.74232 | 29.12247 | 45.07177 | -0.312 |
| F | 37.06906 | 33.00208 | 42.3411  | -0.312 |
| F | 35.05627 | 10.28652 | 36.66974 | -0.313 |
| F | 30.0539  | 10.74816 | 33.0426  | -0.311 |
| F | 25.91687 | 28.01347 | 44.93192 | -0.313 |
| F | 41.87028 | 30.54928 | 33.51116 | -0.312 |
| F | 31.43613 | 23.71781 | 49.72288 | -0.307 |
| F | 34.98361 | 33.31216 | 34.62651 | -0.304 |
| F | 39.89023 | 10.56419 | 36.56589 | -0.317 |
| F | 45.00613 | 13.9176  | 35.54571 | -0.319 |
| F | 35.89337 | 25.02917 | 50.02076 | -0.312 |
| F | 43.8089  | 13.47736 | 46.61653 | -0.317 |

---

---

|   |          |          |          |        |
|---|----------|----------|----------|--------|
| F | 45.57012 | 25.18054 | 31.35476 | -0.317 |
| F | 45.45901 | 26.28932 | 47.55909 | -0.317 |
| F | 41.21156 | 11.92386 | 42.01465 | -0.309 |
| F | 29.02887 | 24.8987  | 27.21211 | -0.319 |
| F | 24.03132 | 16.1093  | 42.63919 | -0.314 |
| F | 39.84618 | 32.1336  | 37.60176 | -0.309 |
| F | 29.35061 | 26.73512 | 47.62413 | -0.311 |
| N | 36.1961  | 14.24351 | 31.46992 | -0.196 |
| C | 26.79364 | 18.5276  | 40.652   | -0.259 |
| C | 26.05994 | 19.05286 | 41.72638 | -0.181 |
| H | 26.21097 | 20.08472 | 42.04608 | 0.184  |
| C | 25.1328  | 18.24139 | 42.40142 | -0.158 |
| H | 24.55165 | 18.61759 | 43.24156 | 0.188  |
| C | 24.96714 | 16.92533 | 41.96516 | 0.244  |
| C | 25.68153 | 16.38281 | 40.89816 | -0.174 |
| H | 25.50979 | 15.35319 | 40.58504 | 0.210  |
| C | 26.61105 | 17.19959 | 40.23668 | -0.156 |
| H | 27.17848 | 16.80515 | 39.39443 | 0.196  |
| C | 35.13391 | 31.35384 | 38.69554 | -0.160 |
| H | 36.16728 | 31.68893 | 38.63147 | 0.202  |
| C | 34.09439 | 32.28131 | 38.7132  | 0.255  |
| C | 32.75352 | 31.91508 | 38.81539 | -0.159 |
| H | 31.98029 | 32.6793  | 38.81815 | 0.188  |
| C | 32.43826 | 30.55088 | 38.91263 | -0.160 |
| H | 31.39864 | 30.23137 | 38.9769  | 0.171  |
| C | 33.46876 | 29.60113 | 38.89617 | -0.242 |
| C | 34.81049 | 29.99261 | 38.79085 | -0.163 |
| H | 35.60244 | 29.24636 | 38.78853 | 0.174  |
| C | 38.4822  | 12.08946 | 37.79685 | -0.156 |
| H | 37.92553 | 11.24139 | 38.19393 | 0.193  |
| C | 39.55328 | 11.88892 | 36.92486 | 0.247  |
| C | 40.29613 | 12.93347 | 36.37665 | -0.161 |
| H | 41.12629 | 12.72049 | 35.70322 | 0.194  |
| C | 39.94837 | 14.24986 | 36.72175 | -0.179 |
| H | 40.51247 | 15.08596 | 36.30955 | 0.208  |
| C | 38.87709 | 14.47774 | 37.60027 | -0.272 |
| C | 38.1419  | 13.40979 | 38.13729 | -0.174 |
| H | 37.29886 | 13.60144 | 38.80375 | 0.187  |
| C | 39.3761  | 21.7677  | 28.47898 | -0.171 |
| H | 39.39019 | 20.74844 | 28.09777 | 0.213  |
| C | 40.04673 | 22.783   | 27.77898 | -0.170 |
| H | 40.59496 | 22.57248 | 26.86161 | 0.195  |
| C | 40.01109 | 24.08015 | 28.28979 | 0.242  |
| C | 39.34244 | 24.41512 | 29.46616 | -0.164 |
| H | 39.3473  | 25.44014 | 29.83322 | 0.197  |
| C | 38.67886 | 23.39187 | 30.1589  | -0.169 |
| H | 38.15355 | 23.61379 | 31.08905 | 0.151  |
| C | 38.6894  | 22.07491 | 29.66688 | -0.263 |
| C | 29.14791 | 28.19334 | 35.95486 | -0.266 |
| C | 29.54133 | 28.74834 | 34.72584 | -0.168 |

---

---

|   |          |          |          |        |
|---|----------|----------|----------|--------|
| H | 29.60975 | 28.12822 | 33.83222 | 0.179  |
| C | 29.8697  | 30.11186 | 34.64705 | -0.158 |
| H | 30.18462 | 30.5653  | 33.70884 | 0.189  |
| C | 29.7855  | 30.88392 | 35.80558 | 0.241  |
| C | 29.37226 | 30.36294 | 37.03071 | -0.163 |
| H | 29.29386 | 31.00828 | 37.9046  | 0.184  |
| C | 29.05262 | 28.99873 | 37.10022 | -0.157 |
| H | 28.74414 | 28.56284 | 38.04973 | 0.179  |
| C | 43.24905 | 15.46874 | 34.97693 | -0.166 |
| H | 43.07392 | 14.90797 | 34.05913 | 0.188  |
| C | 44.2462  | 15.06569 | 35.86519 | 0.251  |
| C | 44.52483 | 15.74161 | 37.05102 | -0.152 |
| H | 45.31928 | 15.39202 | 37.70736 | 0.191  |
| C | 43.76475 | 16.8797  | 37.36519 | -0.135 |
| H | 43.9585  | 17.43738 | 38.2821  | 0.184  |
| C | 42.7474  | 17.30531 | 36.4937  | -0.264 |
| C | 42.48863 | 16.60229 | 35.30503 | -0.196 |
| H | 41.68911 | 16.92074 | 34.63456 | 0.174  |
| C | 41.47772 | 25.75669 | 42.61333 | -0.261 |
| C | 42.66577 | 26.01255 | 43.31322 | -0.163 |
| H | 43.52085 | 25.34338 | 43.2138  | 0.202  |
| C | 42.76018 | 27.13995 | 44.1422  | -0.167 |
| H | 43.66985 | 27.35993 | 44.69785 | 0.207  |
| C | 41.6514  | 27.98078 | 44.24785 | 0.250  |
| C | 40.45704 | 27.74504 | 43.56673 | -0.163 |
| H | 39.61388 | 28.42606 | 43.67721 | 0.193  |
| C | 40.37072 | 26.61189 | 42.74191 | -0.196 |
| H | 39.44539 | 26.40938 | 42.19904 | 0.178  |
| C | 35.30107 | 18.41934 | 46.03733 | -0.264 |
| C | 34.74797 | 19.41365 | 46.86127 | -0.179 |
| H | 33.84032 | 19.93762 | 46.55489 | 0.201  |
| C | 35.37001 | 19.75263 | 48.07093 | -0.161 |
| H | 34.95582 | 20.51547 | 48.72964 | 0.197  |
| C | 36.54675 | 19.08874 | 48.41138 | 0.237  |
| C | 37.12446 | 18.10789 | 47.6082  | -0.173 |
| H | 38.05488 | 17.63003 | 47.91153 | 0.195  |
| C | 36.48366 | 17.76387 | 46.40886 | -0.158 |
| H | 36.91074 | 17.00097 | 45.75703 | 0.173  |
| C | 43.84837 | 23.31716 | 46.0704  | -0.152 |
| H | 43.06542 | 22.59638 | 46.30725 | 0.171  |
| C | 44.14417 | 24.34861 | 46.97843 | -0.159 |
| H | 43.59645 | 24.4489  | 47.91462 | 0.212  |
| C | 45.15695 | 25.24978 | 46.64907 | 0.234  |
| C | 45.88289 | 25.17383 | 45.46166 | -0.157 |
| H | 46.67294 | 25.89297 | 45.25079 | 0.187  |
| C | 45.5791  | 24.13703 | 44.56638 | -0.143 |
| H | 46.14015 | 24.04224 | 43.63687 | 0.170  |
| C | 44.55892 | 23.21395 | 44.86374 | -0.286 |
| C | 35.51751 | 13.44054 | 30.94264 | 0.194  |
| C | 34.45446 | 16.33116 | 28.6009  | -0.155 |

---

---

|   |          |          |          |        |
|---|----------|----------|----------|--------|
| H | 35.35318 | 16.61139 | 28.05196 | 0.193  |
| C | 33.41657 | 15.65555 | 27.93607 | -0.180 |
| H | 33.48871 | 15.40848 | 26.87839 | 0.205  |
| C | 32.26912 | 15.32933 | 28.65957 | 0.228  |
| C | 32.10961 | 15.64614 | 30.00892 | -0.168 |
| H | 31.19318 | 15.38247 | 30.53398 | 0.192  |
| C | 33.15292 | 16.32184 | 30.66208 | -0.193 |
| H | 33.04517 | 16.58656 | 31.71413 | 0.193  |
| C | 34.32238 | 16.66265 | 29.95907 | -0.266 |
| C | 44.42447 | 24.46546 | 31.77084 | 0.249  |
| C | 43.72087 | 23.72306 | 30.82318 | -0.149 |
| H | 44.04687 | 23.70731 | 29.78505 | 0.188  |
| C | 42.58651 | 23.0132  | 31.24477 | -0.151 |
| H | 42.01051 | 22.42976 | 30.52704 | 0.190  |
| C | 42.1899  | 23.05723 | 32.59231 | -0.278 |
| C | 42.90955 | 23.82349 | 33.52478 | -0.178 |
| H | 42.59723 | 23.86671 | 34.56903 | 0.171  |
| C | 44.04673 | 24.5362  | 33.1111  | -0.163 |
| H | 44.62118 | 25.13632 | 33.81363 | 0.185  |
| C | 34.66667 | 29.16213 | 34.8554  | -0.289 |
| C | 35.89154 | 29.73954 | 34.49052 | -0.186 |
| H | 36.7526  | 29.11305 | 34.25404 | 0.193  |
| C | 36.00088 | 31.13979 | 34.41331 | -0.165 |
| H | 36.93445 | 31.6245  | 34.12755 | 0.197  |
| C | 34.87688 | 31.91071 | 34.71223 | 0.246  |
| C | 33.6569  | 31.35594 | 35.09973 | -0.166 |
| H | 32.81183 | 31.99725 | 35.34587 | 0.219  |
| C | 33.55723 | 29.95803 | 35.17314 | -0.154 |
| H | 32.62334 | 29.4924  | 35.49026 | 0.186  |
| C | 36.12777 | 23.4579  | 46.6912  | -0.157 |
| H | 36.20934 | 22.46806 | 46.24243 | 0.178  |
| C | 36.07496 | 24.59637 | 45.87347 | -0.256 |
| C | 35.95832 | 25.88042 | 46.43194 | -0.158 |
| H | 35.93457 | 26.76239 | 45.78917 | 0.164  |
| C | 35.89138 | 26.03049 | 47.82615 | -0.151 |
| H | 35.82337 | 27.00937 | 48.29664 | 0.187  |
| C | 35.95218 | 24.88312 | 48.61924 | 0.251  |
| C | 36.0692  | 23.59958 | 48.08598 | -0.167 |
| H | 36.12347 | 22.73581 | 48.7462  | 0.198  |
| C | 29.34108 | 19.49101 | 31.18282 | -0.258 |
| C | 29.12408 | 20.66693 | 30.45032 | -0.162 |
| H | 29.70433 | 21.56351 | 30.66844 | 0.178  |
| C | 28.17275 | 20.68073 | 29.41909 | -0.163 |
| H | 27.99567 | 21.57311 | 28.8225  | 0.197  |
| C | 27.4528  | 19.51456 | 29.16753 | 0.248  |
| C | 27.63128 | 18.34018 | 29.89682 | -0.152 |
| H | 27.04005 | 17.45731 | 29.66074 | 0.187  |
| C | 28.59378 | 18.33121 | 30.91779 | -0.155 |
| H | 28.76728 | 17.42126 | 31.49245 | 0.164  |
| C | 31.68877 | 19.21566 | 27.91658 | -0.168 |

---



---

|   |          |          |          |        |
|---|----------|----------|----------|--------|
| H | 31.7458  | 18.12942 | 27.92018 | 0.210  |
| C | 31.08325 | 19.88848 | 26.85606 | 0.240  |
| C | 30.97199 | 21.27654 | 26.79837 | -0.155 |
| H | 30.48725 | 21.75722 | 25.95064 | 0.199  |
| C | 31.50349 | 22.02926 | 27.85722 | -0.158 |
| H | 31.43609 | 23.11489 | 27.83488 | 0.201  |
| C | 32.12527 | 21.37734 | 28.93468 | -0.272 |
| C | 32.2227  | 19.97601 | 28.96575 | -0.166 |
| H | 32.69601 | 19.47792 | 29.81215 | 0.167  |
| C | 27.28602 | 17.27857 | 36.19873 | -0.290 |
| C | 25.92302 | 17.37747 | 36.54193 | -0.147 |
| H | 25.35696 | 18.26497 | 36.25811 | 0.170  |
| C | 25.2864  | 16.33789 | 37.23813 | -0.152 |
| H | 24.23469 | 16.39442 | 37.51414 | 0.187  |
| C | 26.03835 | 15.21688 | 37.5871  | 0.228  |
| C | 27.3883  | 15.08527 | 37.2654  | -0.177 |
| H | 27.94238 | 14.19331 | 37.55439 | 0.208  |
| C | 28.011   | 16.13264 | 36.5684  | -0.194 |
| H | 29.06791 | 16.05532 | 36.30817 | 0.179  |
| C | 34.44371 | 18.77343 | 25.89946 | -0.163 |
| H | 33.99092 | 19.61977 | 26.41721 | 0.180  |
| C | 33.65562 | 17.96853 | 25.05786 | -0.180 |
| H | 32.59442 | 18.17263 | 24.90909 | 0.223  |
| C | 34.26823 | 16.8978  | 24.40749 | 0.239  |
| C | 35.62429 | 16.59662 | 24.55059 | -0.161 |
| H | 36.05822 | 15.75657 | 24.01041 | 0.184  |
| C | 36.39869 | 17.4108  | 25.39408 | -0.151 |
| H | 37.46489 | 17.21256 | 25.50917 | 0.174  |
| C | 35.81223 | 18.49446 | 26.07543 | -0.286 |
| C | 28.78355 | 24.66821 | 29.60287 | -0.164 |
| H | 27.8662  | 24.104   | 29.44255 | 0.200  |
| C | 29.26394 | 24.92303 | 30.89651 | -0.175 |
| H | 28.72094 | 24.53258 | 31.75912 | 0.204  |
| C | 30.43756 | 25.67277 | 31.07142 | -0.260 |
| C | 31.13956 | 26.17056 | 29.96155 | -0.148 |
| H | 32.05326 | 26.74562 | 30.10428 | 0.174  |
| C | 30.67324 | 25.91121 | 28.66365 | -0.170 |
| H | 31.20667 | 26.28384 | 27.79046 | 0.197  |
| C | 29.50287 | 25.1681  | 28.51852 | 0.234  |
| C | 30.75228 | 14.85481 | 43.44796 | -0.163 |
| H | 31.52665 | 14.09243 | 43.47601 | 0.193  |
| C | 31.07085 | 16.22096 | 43.3718  | -0.171 |
| H | 32.11383 | 16.54017 | 43.34969 | 0.169  |
| C | 30.03951 | 17.17525 | 43.35756 | -0.264 |
| C | 28.69329 | 16.7765  | 43.40034 | -0.149 |
| H | 27.90145 | 17.52236 | 43.37906 | 0.188  |
| C | 28.36593 | 15.41429 | 43.47238 | -0.161 |
| H | 27.33116 | 15.07975 | 43.50402 | 0.197  |
| C | 29.40813 | 14.48909 | 43.49709 | 0.235  |
| C | 32.67914 | 23.70458 | 46.25234 | -0.149 |

---

---

|   |          |          |          |        |
|---|----------|----------|----------|--------|
| H | 33.24725 | 24.33757 | 45.57298 | 0.185  |
| C | 32.41069 | 24.14185 | 47.55725 | -0.154 |
| H | 32.75033 | 25.112   | 47.91074 | 0.197  |
| C | 31.70324 | 23.28968 | 48.40778 | 0.247  |
| C | 31.24722 | 22.03348 | 48.01273 | -0.157 |
| H | 30.69222 | 21.40904 | 48.71072 | 0.190  |
| C | 31.52262 | 21.60254 | 46.70376 | -0.182 |
| H | 31.17443 | 20.62643 | 46.36258 | 0.173  |
| C | 32.24638 | 22.43969 | 45.83426 | -0.281 |
| C | 34.66118 | 12.65843 | 36.84244 | -0.173 |
| H | 33.97498 | 12.46501 | 37.66801 | 0.205  |
| C | 35.31534 | 11.59838 | 36.21376 | 0.245  |
| C | 36.21385 | 11.77207 | 35.16022 | -0.161 |
| H | 36.71931 | 10.91167 | 34.72231 | 0.193  |
| C | 36.46726 | 13.07755 | 34.71206 | -0.146 |
| H | 37.17284 | 13.25705 | 33.90033 | 0.182  |
| C | 35.8079  | 14.16415 | 35.31275 | -0.255 |
| C | 34.92006 | 13.96019 | 36.38404 | -0.188 |
| H | 34.42052 | 14.80927 | 36.85707 | 0.150  |
| C | 44.16017 | 23.26245 | 37.88021 | -0.290 |
| C | 44.52644 | 23.06131 | 39.22051 | -0.154 |
| H | 43.95994 | 23.541   | 40.02144 | 0.165  |
| C | 45.61276 | 22.23408 | 39.53826 | -0.168 |
| H | 45.9052  | 22.06782 | 40.57421 | 0.187  |
| C | 46.30444 | 21.61736 | 38.4967  | 0.241  |
| C | 45.96361 | 21.79276 | 37.15636 | -0.15  |
| H | 46.53377 | 21.2951  | 36.37258 | 0.184  |
| C | 44.88071 | 22.62972 | 36.85076 | -0.152 |
| H | 44.60382 | 22.7902  | 35.80785 | 0.176  |
| C | 41.5723  | 16.33941 | 47.2826  | -0.149 |
| H | 40.86202 | 16.67289 | 48.03885 | 0.180  |
| C | 42.22361 | 15.1069  | 47.4392  | -0.153 |
| H | 42.03005 | 14.46643 | 48.29831 | 0.185  |
| C | 43.1483  | 14.71836 | 46.46659 | 0.234  |
| C | 43.44361 | 15.50565 | 45.35562 | -0.161 |
| H | 44.16479 | 15.16615 | 44.61399 | 0.210  |
| C | 42.78286 | 16.73523 | 45.21084 | -0.165 |
| H | 42.99009 | 17.35529 | 44.33877 | 0.174  |
| C | 41.84712 | 17.15897 | 46.17163 | -0.282 |
| C | 42.08321 | 17.86536 | 40.8024  | -0.173 |
| H | 41.06565 | 17.88848 | 40.41186 | 0.154  |
| C | 42.67147 | 16.63213 | 41.12106 | -0.161 |
| H | 42.12154 | 15.69744 | 41.02343 | 0.210  |
| C | 43.9885  | 16.62895 | 41.58053 | 0.230  |
| C | 44.74098 | 17.79156 | 41.73754 | -0.158 |
| H | 45.77131 | 17.74201 | 42.08544 | 0.191  |
| C | 44.13695 | 19.02195 | 41.43321 | -0.172 |
| H | 44.70135 | 19.94665 | 41.54581 | 0.197  |
| C | 42.80793 | 19.05663 | 40.97592 | -0.253 |
| C | 35.73871 | 27.20804 | 30.64972 | -0.270 |

---

---

|   |          |          |          |        |
|---|----------|----------|----------|--------|
| C | 36.74356 | 27.10306 | 29.67362 | -0.179 |
| H | 36.85381 | 26.18517 | 29.0964  | 0.208  |
| C | 37.59795 | 28.19416 | 29.43223 | -0.165 |
| H | 38.37917 | 28.14084 | 28.67744 | 0.206  |
| C | 37.41836 | 29.35828 | 30.18057 | 0.238  |
| C | 36.41494 | 29.4943  | 31.14058 | -0.170 |
| H | 36.30337 | 30.42623 | 31.69162 | 0.197  |
| C | 35.56803 | 28.40029 | 31.37224 | -0.168 |
| H | 34.77747 | 28.48522 | 32.11667 | 0.183  |
| C | 35.49291 | 25.22457 | 26.67241 | -0.269 |
| C | 36.87238 | 24.96662 | 26.59074 | -0.172 |
| H | 37.26331 | 23.98945 | 26.87628 | 0.166  |
| C | 37.75861 | 25.95722 | 26.13913 | -0.171 |
| H | 38.83029 | 25.77376 | 26.07626 | 0.211  |
| C | 37.23262 | 27.19551 | 25.7771  | 0.245  |
| C | 35.8702  | 27.48431 | 25.84041 | -0.149 |
| H | 35.50568 | 28.46411 | 25.53912 | 0.185  |
| C | 34.99565 | 26.48453 | 26.28926 | -0.137 |
| H | 33.92497 | 26.68428 | 26.34121 | 0.172  |
| C | 28.63063 | 28.25208 | 42.44811 | -0.127 |
| H | 29.50087 | 28.87071 | 42.22806 | 0.161  |
| C | 27.83341 | 28.5453  | 43.56198 | -0.147 |
| H | 28.06372 | 29.38068 | 44.22095 | 0.187  |
| C | 26.73431 | 27.72587 | 43.81764 | 0.245  |
| C | 26.40254 | 26.63564 | 43.01509 | -0.152 |
| H | 25.53904 | 26.02052 | 43.26204 | 0.184  |
| C | 27.20469 | 26.35116 | 41.89852 | -0.172 |
| H | 26.95749 | 25.51143 | 41.25016 | 0.178  |
| C | 28.30934 | 27.1667  | 41.61394 | -0.263 |
| C | 37.98533 | 30.97815 | 41.3963  | -0.158 |
| H | 38.86473 | 31.5438  | 41.09114 | 0.192  |
| C | 36.94645 | 31.62306 | 42.0703  | 0.254  |
| C | 35.79012 | 30.96286 | 42.484   | -0.155 |
| H | 34.99373 | 31.50894 | 42.98815 | 0.184  |
| C | 35.6753  | 29.59266 | 42.21266 | -0.175 |
| H | 34.77636 | 29.05086 | 42.51058 | 0.179  |
| C | 36.71176 | 28.91905 | 41.54859 | -0.266 |
| C | 37.86517 | 29.60202 | 41.13228 | -0.187 |
| H | 38.66768 | 29.08015 | 40.60901 | 0.192  |
| C | 39.22931 | 16.91895 | 29.86736 | -0.141 |
| H | 38.42912 | 16.18026 | 29.83372 | 0.160  |
| C | 39.76777 | 17.31014 | 31.10638 | -0.274 |
| C | 40.78889 | 18.27575 | 31.15173 | -0.147 |
| H | 41.18286 | 18.60753 | 32.11293 | 0.148  |
| C | 41.27773 | 18.85055 | 29.96861 | -0.153 |
| H | 42.05818 | 19.60741 | 29.98698 | 0.186  |
| C | 40.72067 | 18.44079 | 28.75726 | 0.233  |
| C | 39.70409 | 17.49256 | 28.67443 | -0.164 |
| H | 39.28985 | 17.21271 | 27.70896 | 0.184  |
| C | 39.04675 | 14.88174 | 41.62443 | -0.218 |

---

---

|   |          |          |          |        |
|---|----------|----------|----------|--------|
| H | 38.42342 | 15.34887 | 40.86009 | 0.185  |
| C | 39.71973 | 13.68581 | 41.32478 | -0.184 |
| H | 39.62413 | 13.20951 | 40.34998 | 0.211  |
| C | 40.5343  | 13.1255  | 42.3063  | 0.248  |
| C | 40.70912 | 13.70264 | 43.56553 | -0.157 |
| H | 41.36865 | 13.23928 | 44.2974  | 0.206  |
| C | 40.02921 | 14.89794 | 43.85675 | -0.159 |
| H | 40.15851 | 15.3737  | 44.82822 | 0.196  |
| C | 39.19153 | 15.47625 | 42.89019 | -0.253 |
| C | 27.30636 | 22.64791 | 33.6668  | -0.287 |
| C | 26.49012 | 23.78566 | 33.54348 | -0.162 |
| H | 26.78811 | 24.7251  | 34.01532 | 0.170  |
| C | 25.28402 | 23.69897 | 32.82665 | -0.153 |
| H | 24.62961 | 24.56116 | 32.70723 | 0.187  |
| C | 24.9341  | 22.47136 | 32.26726 | 0.248  |
| C | 25.71467 | 21.32267 | 32.39806 | -0.160 |
| H | 25.39295 | 20.38519 | 31.9484  | 0.190  |
| C | 26.91848 | 21.4172  | 33.11768 | -0.169 |
| H | 27.53625 | 20.52916 | 33.25035 | 0.206  |
| C | 34.32872 | 11.20044 | 41.36435 | 0.250  |
| C | 35.61056 | 11.69124 | 41.60987 | -0.156 |
| H | 36.40916 | 11.01153 | 41.90312 | 0.193  |
| C | 35.82932 | 13.07374 | 41.49157 | -0.184 |
| H | 36.81896 | 13.48309 | 41.69629 | 0.203  |
| C | 34.76644 | 13.91341 | 41.12039 | -0.283 |
| C | 33.48513 | 13.39432 | 40.87835 | -0.187 |
| H | 32.66459 | 14.05741 | 40.6027  | 0.203  |
| C | 33.2557  | 12.01374 | 40.99855 | -0.164 |
| H | 32.26883 | 11.58405 | 40.82998 | 0.203  |
| C | 39.26236 | 21.58508 | 46.99095 | -0.158 |
| H | 38.85124 | 20.63668 | 47.3312  | 0.200  |
| C | 39.16508 | 21.95948 | 45.64148 | -0.279 |
| C | 39.70039 | 23.18403 | 45.20414 | -0.173 |
| H | 39.62942 | 23.47359 | 44.15595 | 0.165  |
| C | 40.32971 | 24.04432 | 46.11496 | -0.168 |
| H | 40.74557 | 24.99761 | 45.79143 | 0.211  |
| C | 40.40999 | 23.64778 | 47.44834 | 0.241  |
| C | 39.89972 | 22.43292 | 47.90867 | -0.152 |
| H | 39.98458 | 22.16338 | 48.96018 | 0.194  |
| C | 30.64601 | 26.06198 | 44.23558 | -0.172 |
| H | 30.40091 | 25.45545 | 43.36199 | 0.163  |
| C | 31.76342 | 26.91036 | 44.21953 | -0.256 |
| C | 32.07438 | 27.70424 | 45.33425 | -0.150 |
| H | 32.93649 | 28.36882 | 45.30383 | 0.163  |
| C | 31.26925 | 27.65034 | 46.48321 | -0.157 |
| H | 31.48744 | 28.25538 | 47.36195 | 0.186  |
| C | 30.16504 | 26.79852 | 46.47452 | 0.251  |
| C | 29.83377 | 26.00465 | 45.3789  | -0.162 |
| H | 28.95716 | 25.36153 | 45.41978 | 0.207  |
| C | 32.21259 | 13.58994 | 33.99496 | -0.196 |

---

---

|   |          |          |          |        |
|---|----------|----------|----------|--------|
| H | 33.2561  | 13.78978 | 34.23701 | 0.205  |
| C | 31.27197 | 14.6324  | 34.00101 | -0.276 |
| C | 29.92416 | 14.37977 | 33.68552 | -0.169 |
| H | 29.19686 | 15.19117 | 33.69583 | 0.187  |
| C | 29.51025 | 13.07491 | 33.36768 | -0.154 |
| H | 28.47235 | 12.85534 | 33.12344 | 0.195  |
| C | 30.46299 | 12.05838 | 33.37091 | 0.242  |
| C | 31.80719 | 12.28033 | 33.68201 | -0.166 |
| H | 32.51234 | 11.45195 | 33.69206 | 0.189  |
| C | 41.11845 | 29.36596 | 33.67388 | 0.249  |
| C | 39.95607 | 29.20443 | 32.91935 | -0.175 |
| H | 39.65198 | 29.96697 | 32.20329 | 0.211  |
| C | 39.21787 | 28.0234  | 33.09314 | -0.173 |
| H | 38.30926 | 27.85799 | 32.51309 | 0.195  |
| C | 39.64862 | 27.05797 | 34.02087 | -0.277 |
| C | 40.83143 | 27.23485 | 34.75348 | -0.165 |
| H | 41.16136 | 26.47829 | 35.46639 | 0.187  |
| C | 41.57842 | 28.411   | 34.58272 | -0.148 |
| H | 42.49438 | 28.58585 | 35.14359 | 0.185  |
| C | 29.36118 | 12.84738 | 39.80604 | -0.162 |
| H | 28.78534 | 12.42475 | 40.6278  | 0.214  |
| C | 29.68178 | 12.06401 | 38.6964  | 0.246  |
| C | 30.41712 | 12.54671 | 37.61245 | -0.168 |
| H | 30.64677 | 11.89951 | 36.7665  | 0.199  |
| C | 30.86135 | 13.87776 | 37.65297 | -0.190 |
| H | 31.44061 | 14.28429 | 36.82318 | 0.202  |
| C | 30.55028 | 14.68679 | 38.75678 | -0.288 |
| C | 29.8072  | 14.18047 | 39.83341 | -0.177 |
| H | 29.56063 | 14.81377 | 40.68508 | 0.197  |
| C | 40.87193 | 30.10638 | 38.42092 | -0.149 |
| H | 41.72059 | 30.69382 | 38.7672  | 0.192  |
| C | 39.80364 | 30.73466 | 37.77883 | 0.247  |
| C | 38.68684 | 30.03593 | 37.31534 | -0.183 |
| H | 37.86813 | 30.56531 | 36.82796 | 0.213  |
| C | 38.63958 | 28.64723 | 37.4982  | -0.166 |
| H | 37.78275 | 28.07267 | 37.14258 | 0.163  |
| C | 39.70624 | 27.99181 | 38.13278 | -0.248 |
| C | 40.81807 | 28.71324 | 38.59733 | -0.165 |
| H | 41.64779 | 28.19958 | 39.08456 | 0.170  |
| C | 27.87681 | 22.53812 | 43.64614 | -0.289 |
| C | 26.48659 | 22.62653 | 43.46682 | -0.152 |
| H | 26.06508 | 22.71688 | 42.46353 | 0.168  |
| C | 25.63518 | 22.61015 | 44.58269 | -0.160 |
| H | 24.55503 | 22.68658 | 44.47328 | 0.187  |
| C | 26.204   | 22.49927 | 45.85191 | 0.247  |
| C | 27.58139 | 22.41944 | 46.05582 | -0.156 |
| H | 27.98628 | 22.36256 | 47.06527 | 0.193  |
| C | 28.42521 | 22.43479 | 44.93466 | -0.185 |
| H | 29.50483 | 22.37188 | 45.06857 | 0.209  |
| C | 34.66534 | 12.43204 | 30.33616 | -0.582 |

---

|   |          |          |          |        |
|---|----------|----------|----------|--------|
| H | 34.15634 | 12.84448 | 29.45062 | 0.248  |
| H | 33.89443 | 12.11082 | 31.05349 | 0.235  |
| H | 35.25965 | 11.55692 | 30.03349 | 0.226  |
| C | 25.65429 | 23.41087 | 37.70681 | -0.261 |
| C | 24.77051 | 24.45774 | 37.39417 | -0.139 |
| H | 24.90016 | 25.43782 | 37.85335 | 0.166  |
| C | 23.70557 | 24.23408 | 36.50908 | -0.155 |
| H | 23.00117 | 25.02159 | 36.24608 | 0.186  |
| C | 23.56662 | 22.96123 | 35.9571  | 0.252  |
| C | 24.43359 | 21.90659 | 36.24466 | -0.154 |
| H | 24.30365 | 20.9424  | 35.75582 | 0.197  |
| C | 25.4957  | 22.13808 | 37.13519 | -0.168 |
| H | 26.19369 | 21.33351 | 37.37732 | 0.169  |

**Table S3.** The comparison of catalytic activity of the different catalysts.

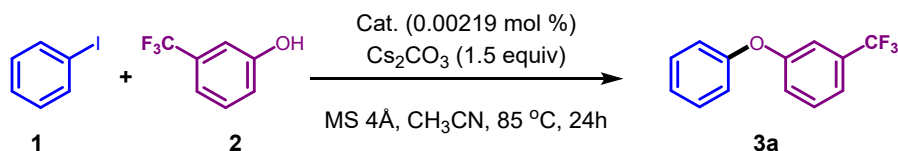

| Entry            | Catalysts                                                                          | TON <sup>[a]</sup> |
|------------------|------------------------------------------------------------------------------------|--------------------|
| 1                | $\text{Au}_{41}\text{Cu}_{33}$                                                     | 30593              |
| 2 <sup>[b]</sup> | $\text{Cu}(\text{MeCN})_4\text{BF}_4$                                              | 1167               |
| 3 <sup>[b]</sup> | $\text{C}_6\text{H}_4\text{FSAu}$                                                  | 0                  |
| 4 <sup>[c]</sup> | $[\text{Au}_9\text{Cu}_2(\text{PPh}_3)_8\text{Cl}_2]\text{BF}_4$                   | 18000              |
| 5 <sup>[c]</sup> | $\text{AuCu}_{24}\text{H}_{22}(\text{C}_{18}\text{H}_{11}\text{F}_3\text{P})_{12}$ | 21788              |

[a] Reaction conditions: catalysts (0.00219 mol%), **1** (1.8 mmol, 1.2 equiv), **2** (1.2 mmol, 1 equiv), MS 4Å (20 mg), in CH<sub>3</sub>CN (1.2 mL), stirred at 85 °C for 24 h. The yield of **3a** was determined by <sup>19</sup>F NMR. [b] XC-72 was added to the reaction to keep the same catalysis conditions. [c] The clusters were supported on XC-72 before catalysis.

**Table S4.** The adsorption results of C<sub>6</sub>H<sub>5</sub>-I and C<sub>6</sub>H<sub>5</sub>-OH at uncoordinated copper sites (in normal font) and other Cu sites (in italic).

|                                   | Adsorption energy (in eV) | C-I/O-H bond length (in Å) | Charge transfer (in  e ) |
|-----------------------------------|---------------------------|----------------------------|--------------------------|
| C <sub>6</sub> H <sub>5</sub> -I  | 1.89                      | 2.74                       | 0.173                    |
|                                   | <i>1.67</i>               | <i>2.59</i>                | <i>0.137</i>             |
| C <sub>6</sub> H <sub>5</sub> -OH | 0.67                      | 1.37                       | 0.158                    |

|  |             |             |              |
|--|-------------|-------------|--------------|
|  | <i>0.18</i> | <i>1.28</i> | <i>0.112</i> |
|--|-------------|-------------|--------------|

## References:

- (1) Nishina, N.; Yamamoto, Y. *Synlett.*, 2007, 11, 1767.
- (2) Shen, H.; Han, Y.; Wu, Q.; Peng, J.; Teo, B.; Zheng N. *Small Methods*, 2021, 5, 2000603.
- (3) Chen, A.; Kang, X.; Jin, S.; Du, W.; Wang, S.; Zhu, M. *J. Phys. Chem. Lett.* 2019, 10, 6124.
- (4) CrysAlisPro Version 1.171.35.19. (2011). Agilent Technologies Inc. Santa Clara, CA, USA.
- (5) Sheldrick, G. M. *Acta Cryst. A* 2015, 71, 3.
- (6) Sheldrick, G. M. *Acta Cryst. A* 2008, 64, 112.
- (7) Dolomanov, O. V.; Bourhis, L. J.; Gildea, R. J.; Howard, J. A. K.; Puschmann, H. *J. Appl. Cryst.* 2009, 42, 339.
- (8) Huebschle, C. B.; Sheldrick, G. M.; Dittrich, B. *J. Appl. Cryst.* 2011, 44, 1281.
- (9) Perdew J. P.; Burke K.; Ernzerhof M. *Phys. Rev. Lett.* 1996, 77, 3865.
- (10) Delley B. *J. Chem. Phys.* 1990, 92, 508.
- (11) Delley B. *J. Chem. Phys.* 2000, 113, 7756.
- (12) Mulliken R. S.; *J. Chem. Phys.* 1955, 23, 1833.
- (13) Chan, L.; McNally, A.; Toh, Q. Y.; Mendozaa, A.; Gaunt, M. *J. Chem. Sci.* 2015, 6, 1277.
- (14) Zhai, Y. T.; Chen, X. F.; Zhou, W.; Fan, M. Y.; Lai, Y. S.; Ma, D. W. *J. Org. Chem.* 2017, 82, 4964.
- (15) Hu, T. J.; Chen, X. R.; Wang, J.; Huang, J. *ChemCatChem*, 2011, 3, 661.
- (16) Fan, M. Y.; Zhou, W.; Jiang, Y. W.; Ma, D. W. *Angew. Chem. Int. Ed.* 2016, 55, 6211.
- (17) Bahrami, K.; Khodamorady, M. *Catal. Lett.* 2019, 149, 688.
- (18) Kikushima, K.; Miyamoto, N.; Watanabe, K.; Koseki, D.; Kita, Y.; Dohi, T. *Org. Lett.* 2022, 24, 1924.
- (19) Rouzifar, M.; Sobhani, S.; Farrokhi, A.; Sansano, J. M. *New J. Chem.* 2021, 45, 19963.
